1 **Co-translational protein targeting facilitates centrosomal recruitment of PCNT during**  
2 **centrosome maturation**

3

4 Guadalupe Sepulveda<sup>1†</sup>, Mark Antkowiak<sup>1†</sup>, Ingrid Brust-Mascher<sup>2†</sup>, Karan Mahe<sup>1</sup>, Tingyoung  
5 Ou<sup>1</sup>, Noemi Castro<sup>1</sup>, Lana N. Christensen<sup>1</sup>, Lee Cheung<sup>1</sup>, Daniel Yoon<sup>1</sup>, Bo Huang<sup>3</sup>, and Li-En  
6 Jao<sup>1\*</sup>

7

8 **Affiliations:**

9 <sup>1</sup>Department of Cell Biology and Human Anatomy, University of California, Davis, School of  
10 Medicine, Davis, CA 95616, USA

11

12 <sup>2</sup>Department of Anatomy, Physiology and Cell Biology, University of California, Davis, School of  
13 Veterinary Medicine, Davis, CA 95616, USA

14

15 <sup>3</sup>Department of Pharmaceutical Chemistry, University of California, San Francisco, San  
16 Francisco, CA 94143, USA

17

18 \*Correspondence to: [ljao@ucdavis.edu](mailto:ljao@ucdavis.edu)

19

20 <sup>†</sup>These authors contributed equally to this work.

21 **Abstract**

22 As microtubule-organizing centers of animal cells, centrosomes guide the formation of the  
23 bipolar spindle that segregates chromosomes during mitosis. At mitosis onset, centrosomes  
24 maximize microtubule-organizing activity by rapidly expanding the pericentriolar material (PCM).  
25 This process is in part driven by the large PCM protein pericentrin (PCNT), as its level increases  
26 at the PCM and helps recruit additional PCM components. However, the mechanism underlying  
27 the timely centrosomal enrichment of PCNT remains unclear. Here we show that PCNT is  
28 delivered co-translationally to centrosomes during early mitosis by cytoplasmic dynein, as  
29 evidenced by centrosomal enrichment of *PCNT* mRNA, its translation near the centrosome, and  
30 requirement of intact polysomes for *PCNT* mRNA localization. Additionally, the microtubule  
31 minus-end regulator, ASPM, is also targeted co-translationally to mitotic spindle poles.  
32 Together, these findings suggest that co-translational targeting of cytoplasmic proteins to  
33 specific subcellular destinations may be a generalized protein targeting mechanism.

## 34 **Introduction**

35 A centrosome consists of a pair of centrioles embedded in a protein-dense matrix known as the  
36 pericentriolar material (PCM). The PCM functions as a major microtubule organizing center in  
37 animal cells (Gould & Borisy, 1977) as it serves as a platform onto which  $\gamma$ -tubulin ring  
38 complexes ( $\gamma$ -TuRCs), the main scaffold mediating microtubule nucleation, are loaded (Moritz,  
39 Braunfeld, Sedat, Alberts, & Agard, 1995; Zheng, Wong, Alberts, & Mitchison, 1995).

40

41 At the onset of mitosis, centrosomes rapidly expand their PCM. This process, termed  
42 centrosome maturation, is essential for proper spindle formation and chromosome segregation  
43 (Woodruff, Wueseke, & Hyman, 2014). Centrosome maturation is initiated by phosphorylation of  
44 core PCM components, such as Pericentrin (PCNT) and Cnn, by mitotic kinases PLK1/Polo and  
45 Aurora kinase A (Conduit, Feng, et al., 2014; Joukov, Walter, & De Nicolo, 2014; Kinoshita et  
46 al., 2005; Lee & Rhee, 2011). These events then trigger the cooperative assembly of additional  
47 PCM scaffold proteins (e.g., PCNT, CEP192/SPD-2, CEP152/Asterless,  
48 CEP215/CDK5RAP2/Cnn or SPD-5) into an expanded PCM matrix that encases the centrioles  
49 (Conduit, Richens, et al., 2014; Hamill, Severson, Carter, & Bowerman, 2002; Kemp, Kopish,  
50 Zipperlen, Ahringer, & O'Connell, 2004), culminating in the recruitment of additional  $\gamma$ -TuRCs  
51 and tubulin molecules that promote microtubule nucleation and render centrosomes competent  
52 for mediating the formation of bipolar spindles and chromosome segregation (Conduit,  
53 Wainman, & Raff, 2015; Gopalakrishnan et al., 2011; Woodruff et al., 2014).

54

55 Pericentrin (PCNT) is one of the first core PCM components identified to be required for spindle  
56 formation (Doxsey, Stein, Evans, Calarco, & Kirschner, 1994). Importantly, mutations in *PCNT*  
57 have been linked to several human disorders including primordial dwarfism (Anitha et al., 2009;

58 Delaval & Doxsey, 2010; Griffith et al., 2008; Numata et al., 2009; Rauch et al., 2008).  
59 Pericentrin is an unusually large coiled-coil protein (3,336 amino acids in human) that forms  
60 elongated fibrils with its C-terminus anchored near the centriole wall and the N-terminus  
61 extended outwardly and radially across PCM zones in interphase cells (Lawo, Hasegan, Gupta,  
62 & Pelletier, 2012; Mennella et al., 2012; Sonnen, Schermelleh, Leonhardt, & Nigg, 2012).  
63 Recent studies showed that pericentrin plays an evolutionarily conserved role in mitotic PCM  
64 expansion and interphase centrosome organization, as loss of pericentrin activity in human,  
65 mice, and flies all results in failed recruitment of other PCM components to the centrosome and  
66 affects the same set of downstream orthologous proteins in each system (e.g., CEP215 in  
67 human, Cep215 in mice, and Cnn in flies) (C. T. Chen et al., 2014; Lee & Rhee, 2011; Lerit et  
68 al., 2015).  
69  
70 In vertebrates, a key function of PCNT is to initiate centrosome maturation (Lee & Rhee, 2011)  
71 and serve as a scaffold for the recruitment of other PCM proteins (Haren, Stearns, & Luders,  
72 2009; Lawo et al., 2012; Purohit, Tynan, Vallee, & Doxsey, 1999; Zimmerman, Sillibourne,  
73 Rosa, & Doxsey, 2004). However, the mechanism underlying the timely synthesis and  
74 recruitment of a large sum of PCNT proteins to the PCM is as yet unresolved. Given its large  
75 size (>3,300 amino acids) and the modest rate of translation elongation (~3-10 amino acids per  
76 second, Bostrom et al., 1986; Ingolia, Lareau, & Weissman, 2011; Morisaki et al., 2016; Pichon  
77 et al., 2016; Wang, Han, Zhou, & Zhuang, 2016; Wu, Eliscovich, Yoon, & Singer, 2016; Yan,  
78 Hoek, Vale, & Tanenbaum, 2016), synthesizing a full-length PCNT protein would take ~10-20  
79 minutes to complete after translation initiation. Notably, after the onset of mitosis, the PCM  
80 reaches its maximal size immediately before metaphase in ~30 minutes in human cells (Gavet  
81 & Pines, 2010; Lenart et al., 2007). Thus, the cell faces a kinetics challenge of synthesizing,

82 transporting, and incorporating multiple large PCM proteins such as PCNT into mitotic  
83 centrosomes within this short time frame.

84

85 We show here that *pericentrin* mRNA is spatially enriched at the centrosome during mitosis in  
86 zebrafish embryos and cultured human cells. In cultured cells, the centrosomal enrichment of  
87 *PCNT* mRNA predominantly occurs during early mitosis, concomitantly with the peak of  
88 centrosome maturation. We further show that centrosomally localized *PCNT* mRNA undergoes  
89 active translation and that acute inhibition of translation compromises the incorporation of PCNT  
90 proteins into the centrosome during early mitosis. Moreover, we find that centrosomal  
91 localization of *PCNT* mRNA requires intact polysomes, microtubules, and cytoplasmic dynein  
92 activity. Taken together, our results support a model in which translating *PCNT* polysomes are  
93 being actively transported toward the centrosome during centrosome maturation. We propose  
94 that by targeting actively translating polysomes toward centrosomes, the cell can overcome the  
95 kinetics challenge of synthesizing, transporting, and incorporating the unusually large PCNT  
96 proteins into the centrosome. Lastly, we find that the cell appears to use a similar co-  
97 translational targeting mechanism to synthesize and deliver another unusually large protein, the  
98 microtubule minus-end regulator, ASPM, to the mitotic spindle poles. Thus, co-translational  
99 protein targeting might be a mechanism widely employed by the cell to transport cytoplasmic  
100 proteins to specific subcellular compartments and organelles.

101 **Results**

102 **Zebrafish *pcnt* mRNA is localized to the centrosome in blastula-stage embryos.**

103 We found that *pericentrin* (*pcnt*) transcripts were localized to distinct foci in early zebrafish  
104 embryos, whereas those of three other core PCM components, *cep152*, *cep192*, and *cep215*,  
105 showed a pan-cellular distribution (Figure 1A). This striking *pcnt* mRNA localization was  
106 observed using two independent, non-overlapping antisense probes against the 5' or 3' portion  
107 of RNA (Figure 1B). The specificity of *in situ* hybridization was further confirmed by the loss of  
108 signals in two frameshift maternal-zygotic *pcnt* knockout embryos (*MZpcnt<sup>Δup2</sup>* and *MZpcnt<sup>Δup5</sup>*)  
109 (Figure 1B and Figure 1- figure supplement 1), where the *pcnt* transcripts were susceptible to  
110 nonsense-mediated decay pathway. By co-staining with the centrosome marker  $\gamma$ -tubulin, we  
111 demonstrated that zebrafish *pcnt* mRNA is specifically localized to the centrosome (Figure 1C).

112

113 **Human *PCNT* mRNA is enriched at the centrosome during early mitosis.**

114 To test whether centrosomal localization of *pcnt* mRNA is conserved beyond early zebrafish  
115 embryos, we examined the localization of human *PCNT* mRNA in cultured HeLa cells using  
116 fluorescent *in situ* hybridization (FISH). Consistent with our observation in zebrafish, human  
117 *PCNT* mRNA was also localized to the centrosome (Figure 2). Interestingly, this centrosomal  
118 enrichment of *PCNT* mRNA was most prominent during early mitosis (i.e., prophase and  
119 prometaphase) and declined after prometaphase. The signal specificity was confirmed by two  
120 non-overlapping probes against the 5' or 3' portion of the *PCNT* transcript (Figure 2- figure  
121 supplement 1A). Furthermore, using an alternative FISH method, Stellaris® single-molecule  
122 FISH (smFISH) against the 5' or 3' portion of the *PCNT* transcript, we observed highly similar  
123 centrosomal enrichment of *PCNT* mRNA during early mitosis, with near single-molecule  
124 resolution (Figure 2- figure supplement 1B). Similar smFISH results were observed in both HeLa

125 and RPE-1 cells (data not shown). Together, these results indicate that *PCNT* mRNA is  
126 specifically enriched at the centrosome during early mitosis in cultured human cells. We  
127 speculate that the seemingly constant presence of zebrafish *pcnt* mRNA at the centrosome of  
128 early blastula-stage embryos is due to the fast cell cycle without gap phases at this stage (~20  
129 minutes per cycle).

130

131 **Zebrafish *pcnt* mRNA is localized to the centrosome of mitotic retinal neuroepithelial**  
132 **cells *in vivo*.**

133 We next tested whether centrosomal localization of *pcnt* mRNA also takes place in differentiated  
134 tissues *in vivo*. We focused on the retinal neuroepithelia of 1 day old zebrafish because at this  
135 developmental stage, retinal neuroepithelial cells in different cell cycle stages can be readily  
136 identified based on the known patterns of interkinetic nuclear migration (e.g., mitotic cells at the  
137 apical side of retina) (Baye & Link, 2007). Again, we observed that zebrafish *pcnt* mRNA was  
138 enriched at the centrosome of mitotic, but not of non-mitotic, neuroepithelial cells (Figure 2-  
139 figure supplement 2). We thus conclude that centrosomal enrichment of *pericentrin* mRNA is  
140 likely a conserved process in mitotic cells.

141

142 **Centrosomally localized *PCNT* mRNA undergoes active translation.**

143 Interestingly, the timing of this unique centrosomal accumulation of *PCNT* mRNA in cultured  
144 cells (Figure 2) overlaps precisely with that of centrosome maturation (Khodjakov & Rieder,  
145 1999; Piehl, Tulu, Wadsworth, & Cassimeris, 2004). These observations raise the intriguing  
146 possibility that *PCNT* mRNA might be translated near the centrosome to facilitate the  
147 incorporation of *PCNT* proteins into the PCM during centrosome maturation.

148

149 To determine whether *PCNT* mRNA is actively translated near the centrosome, we developed a  
150 strategy to detect actively translating *PCNT* polysomes by combining *PCNT* smFISH and double  
151 immunofluorescence to label *PCNT* mRNA, and the N- and C-termini of *PCNT* protein  
152 simultaneously (Figure 3A). Given the inter-ribosome distance of approximately 260 nucleotides  
153 on a transcript during translation (Wang et al., 2016) and the large size of *PCNT* mRNA (10 knt),  
154 a single *PCNT* transcript can be actively translated by as many as 40 ribosomes  
155 simultaneously. Therefore, up to 40 nascent polypeptides emerging from a single *PCNT*  
156 polysome can be visualized by anti-*PCNT* N-terminus immunostaining. By combining this  
157 immunostaining strategy with *PCNT* smFISH, multiple nascent *PCNT* polypeptides can be  
158 visualized on a single *PCNT* mRNA. Furthermore, the signals from antibody staining are  
159 determined by the location of the epitopes. Therefore, the translating nascent *PCNT*  
160 polypeptides, with the C-terminus not yet synthesized, would only show positive signals from  
161 anti-*PCNT* N-terminus immunostaining (and be positive for *PCNT* smFISH), whereas fully  
162 synthesized *PCNT* protein would show signals from both anti-*PCNT* N- and C-terminus  
163 immunostaining (and be negative for *PCNT* smFISH because of release of the full-length protein  
164 from the RNA-bound polysomes).

165  
166 Using this strategy, we detected nascent *PCNT* polypeptides emerging from *PCNT* mRNA near  
167 the centrosome during early mitosis (Figure 3B, top row, *PCNT* N<sup>+</sup>/C<sup>-</sup>/*PCNT* smFISH<sup>+</sup>). As an  
168 important control, we showed that colocalization of *PCNT* mRNA with anti-*PCNT* N-terminus  
169 signals was lost after a brief treatment of cells with puromycin (Figure 3B, bottom row), under a  
170 condition confirmed to inhibit translation by dissociating the ribosomes and releasing the  
171 nascent polypeptides (Figure 3- figure supplement 1, Wang et al., 2016; Yan et al., 2016). Next,  
172 we developed a methodology to quantify the effect of puromycin treatment on the colocalization  
173 of *PCNT* mRNA and anti-*PCNT* N-terminus signals in three dimensional (3D) voxels rendered



174 from confocal z-stacks. Given that the mean radius of a mitotic centrosome is  $\sim 1 \mu\text{m}$  (Figure 3-  
175 figure supplement 2), we specifically quantified the fraction of *PCNT* mRNA between 1 and 3  
176  $\mu\text{m}$  from the center of each centrosome—i.e., the RNA close to, but not within, the  
177 centrosome—with anti-PCNT N-terminus signals in early mitotic cells, with or without the brief  
178 puromycin treatment. Consistent with the results shown in Figure 3B, upon the short puromycin  
179 treatment, the fraction of *PCNT* mRNA with anti-PCNT N-terminus signals was significantly  
180 reduced, with many *PCNT* mRNA no longer bearing anti-PCNT N-terminus signals (Figure 3C).  
181 Together, these results indicate that during early mitosis, a population of *PCNT* mRNA is  
182 undergoing active translation near the centrosome.

183

184 **Centrosomal localization of *pcnt/PCNT* mRNA requires intact polysomes, microtubules,**  
185 **and dynein activity.**

186 In addition to the loss of anti-PCNT N-terminus signals from *PCNT* mRNA, surprisingly, the brief  
187 puromycin treatment led to the population of *PCNT* mRNA shifting away from the centrosome  
188 (Figure 4A and B). Similarly, when zebrafish embryos were injected with puromycin at the 1-cell  
189 stage, *pcnt* transcripts became diffused throughout the cell (Figure 4- figure supplement 1).  
190 Because puromycin dissociates ribosomes and nascent polypeptides, these observations  
191 suggest that *PCNT/pcnt* mRNAs in human and zebrafish are enriched near the centrosome by  
192 tethering to the actively translating ribosomes.

193

194 To further test the dependency of centrosomal enrichment of *PCNT* mRNA on intact, actively  
195 translating polysomes, we treated the cultured cells with either emetine, which stabilizes  
196 polysomes by irreversibly binding the ribosomal 40S subunit and thus “freezing” translation  
197 during elongation (Jimenez, Carrasco, & Vazquez, 1977), or harringtonine, which disrupts  
198 polysomes by blocking the initiation step of translation while allowing downstream ribosomes to

199 run off from the mRNA (Huang, 1975). We found that *PCNT* mRNA localization patterns in  
200 emetine- and harringtonine-treated cells resembled those observed in vehicle- (control) and  
201 puromycin-treated cells, respectively (Figure 4A and B). Congruent with the detection of nascent  
202 *PCNT* polypeptides near the centrosome (Figure 3), these data support the model that  
203 centrosomal enrichment of *PCNT* mRNA relies on centrosomal enrichment of polysomes that  
204 are translating *PCNT* mRNA.

205  
206 We often observed that the two centrosomes in early mitotic cells were asymmetric in size  
207 where more *PCNT* mRNA was enriched near the larger centrosome (Figure 4- figure  
208 supplement 2). Because the microtubule nucleation activity is often positively correlated with the  
209 centrosome size, we speculated that centrosomal enrichment of *pericentrin* mRNA/polysomes  
210 might be a microtubule-dependent process. We thus tested if the localization of *pericentrin*  
211 mRNA would be perturbed when microtubules were depolymerized. We found that in both  
212 zebrafish and cultured human cells, *pcnt/PCNT* mRNA was no longer enriched around the  
213 centrosome upon microtubule depolymerization (Figure 4C and D). In contrast, a cytochalasin B  
214 treatment, which disrupts the actin cytoskeleton, had no effect on the centrosomal enrichment of  
215 *PCNT* mRNA (Figure 4- figure supplement 3). These results suggest that microtubules, but not  
216 actin filaments, serve as “tracks” on which *pericentrin* mRNA/polysomes are transported.

217  
218 Given that cytoplasmic dynein is a common minus-end-directed, microtubule-based motor that  
219 transports cargo toward the microtubule minus end (i.e., toward the centrosome), we next tested  
220 whether centrosomal localization of *PCNT* mRNA is a dynein-dependent process. We treated  
221 the cells with ciliobrevin D, a specific small molecule inhibitor of cytoplasmic dynein (Firestone  
222 et al., 2012) and quantified the effect of this treatment on the centrosomal localization of *PCNT*  
223 mRNA. We found that *PCNT* mRNA was no longer enriched at the centrosome upon the

224 ciliobrevin D treatment (Figure 4E). Together, these results indicate that centrosomal  
225 enrichment of *pericentrin* mRNA during early mitosis is a translation-, microtubule- and dynein-  
226 dependent process.

227

228 **Active translation of *PCNT* mRNA during early mitosis contributes to the optimal**  
229 **incorporation of PCNT protein into the mitotic PCM.**

230 To determine the functional significance of translation of centrosomally localized *PCNT* mRNA  
231 during early mitosis, we compared centrosomal PCNT levels shortly before and after mitotic  
232 entry (i.e., late G2 vs. early M phase). We arrested cultured human cells from progression out of  
233 late G2 phase using the CDK1 inhibitor RO-3306 (Vassilev et al., 2006). CDK1 is largely  
234 inactive during G2 and becomes activated at the onset of mitosis (Gavet & Pines, 2010; M.  
235 Jackman, Lindon, Nigg, & Pines, 2003). In the presence of RO-3306, cells can be held at late  
236 G2 phase, and upon inhibitor washout, cells can be released into mitosis. Because cell cycle  
237 synchronization is rarely 100% homogeneous in a cell population, we decided to quantify the  
238 amount of centrosomal PCNT at the single cell level using anti-PCNT immunostaining of  
239 individual cells. To confidently identify late G2 cells in RO-3306-treated population, we used a  
240 RPE-1 cell line stably expressing Centrin-GFP (Uetake et al., 2007) and categorized the cells as  
241 “late G2” if (1) their two centrosomes (with two centrin dots per centrosome) were separated by  
242  $> 2 \mu\text{m}$ —a sign indicating the loss of centrosome cohesion that occurs during late G2 to M  
243 transition (Bahe, Stierhof, Wilkinson, Leiss, & Nigg, 2005; Fry et al., 1998; Mardin, Agircan,  
244 Lange, & Schiebel, 2011) and (2) their DNA was not condensed. We identified the cells as early  
245 M phase cells (i.e., prophase or prometaphase) 25 minutes after RO-3306 washout by  
246 observing DNA morphology.

247

248 Using this strategy, we found that approximately 2-fold more PCNT proteins were incorporated  
249 into the centrosomes in early mitotic cells as compared to late G2 cells (Figure 5A). Importantly,  
250 the numbers of *PCNT* mRNA did not significantly differ between late G2 and early M phases,  
251 even though there was an approximately 4-fold increase from G1 to late G2 phases (Figure 5B).  
252 Therefore, these results indicate that the increase in centrosomal PCNT protein levels when  
253 cells progress from G2 to M phases (e.g., the 25-minute period after RO-3306 washout) is due  
254 to upregulation of translation and not to altered mRNA abundance.

255  
256 To independently assess the impact of translation during early mitosis on PCNT incorporation  
257 into the centrosomes, we disrupted this process by pulsing the RO-3306 synchronized cells with  
258 puromycin to inhibit translation for two minutes, followed by immediate fixation and anti-PCNT  
259 immunostaining. As previously shown, this condition inhibits translation acutely and dissociates  
260 PCNT nascent polypeptides from *PCNT* mRNA-containing polysomes, including those near the  
261 centrosome (Figure 3). We found that in the puromycin-treated cells, ~30% fewer PCNT  
262 molecules were incorporated into the PCM than in the control cells during  
263 prophase/prometaphase (Figure 5C). These results indicate that active translation during  
264 prophase/prometaphase is required for efficient incorporation of PCNT into the mitotic  
265 centrosomes; disruption of this process, even just briefly, significantly affects the PCNT level at  
266 the centrosomes.

267  
268 Collectively, these results indicate that active translation of *PCNT* mRNA during early mitosis  
269 contributes to the optimal incorporation of PCNT proteins into the mitotic PCM and that this is  
270 most plausibly achieved by co-translational targeting of the *PCNT* mRNA-containing polysomes  
271 to the proximity of the mitotic centrosomes.

272

273 ***ASPM* mRNA is enriched at the centrosome in a translation-dependent manner during**  
274 **mitosis.**

275 To determine if the cell uses a similar co-translational targeting strategy to target other large  
276 proteins to the centrosome, we examined the distribution of *CEP192*, *CDK5RAP2/CEP215*, and  
277 *ASPM* mRNA in cultured human cells. We found that while *CEP192* and *CEP215* mRNA did not  
278 show any centrosomal enrichment during early mitosis (data not shown), *ASPM* mRNA was  
279 strongly enriched at the centrosome during prometaphase and metaphase in both HeLa and  
280 RPE-1 cells (Figure 6). Furthermore, upon a short puromycin treatment, *ASPM* mRNA became  
281 dispersed throughout the cell, indicating that centrosomal enrichment of *ASPM* mRNA also  
282 requires intact polysomes as in the case with *PCNT* mRNA. *ASPM* (and its fly ortholog *Asp*) is  
283 not a PCM component *per se*, but a microtubule minus-end regulator (Jiang et al., 2017) and a  
284 spindle-pole focusing factor (Ito & Goshima, 2015; Ripoll, Pimpinelli, Valdivia, & Avila, 1985;  
285 Tungadi, Ito, Kiyomitsu, & Goshima, 2017). It is highly enriched at the mitotic spindle poles,  
286 particularly from early prometaphase to metaphase (Ito & Goshima, 2015; Jiang et al., 2017;  
287 Tungadi et al., 2017). Therefore, these data demonstrate another example of spatiotemporal  
288 coupling between active translation and translocation of polysomes to the final destination of the  
289 protein being synthesized.

## 290 **Discussion**

291 Here we report that PCNT protein is delivered co-translationally to the centrosome during  
292 centrosome maturation through a microtubule- and dynein-dependent process. This process is  
293 demonstrated by centrosomal enrichment of *PCNT* mRNA, its translation near the centrosome,  
294 and requirement of intact translation machinery for *PCNT* mRNA localization during early  
295 mitosis. The translation- and microtubule-dependent centrosomal enrichment of *pericentrin*  
296 mRNA is observed in both zebrafish embryos and human somatic cell lines. Interestingly, the  
297 mRNA of the sole *pcnt* ortholog, *plp*, of *Drosophila melanogaster*, was also previously reported  
298 to localize to the centrosome in early fly embryos (Lecuyer et al., 2007). Although it has not  
299 been shown if the centrosomally localized *plp* mRNA undergoes active translation, it is tempting  
300 to speculate that co-translational targeting of PCNT (and its orthologous proteins) to the  
301 centrosome is an evolutionarily conserved process. In addition to PCNT, the cell appears to use  
302 a similar co-translational targeting strategy to deliver the large microtubule minus-end  
303 regulator/spindle-pole focusing factor, ASPM, to mitotic spindle poles, as *ASPM* mRNA is  
304 strongly enriched at mitotic spindle poles in a translation-dependent manner, concomitantly with  
305 the ASPM protein level reaching its maximum at the same place. We suspect that co-  
306 translational targeting of polysomes translating a subset of cytoplasmic proteins to specific  
307 subcellular destinations is a widespread mechanism used in post-transcriptional gene  
308 regulation.

309

## 310 **Evidence supporting translation of *PCNT* mRNA near the centrosome**

311 In this study, we also developed a strategy of visualizing active translation. We took advantage  
312 of the large size of *PCNT* mRNA and combined *PCNT* smFISH and immunofluorescence  
313 against the N- or C-terminal epitopes of PCNT nascent polypeptides to detect which *PCNT*

314 mRNA molecules were undergoing active translation (Figure 3). This imaging-based method  
315 allowed us to determine whether the PCNT was being newly synthesized “on site” or the PCNT  
316 was made somewhere within the cell and then transported/diffused to the centrosome because  
317 only the former would show positive signals for N-, but not C-terminus immunostaining of the  
318 synthesized protein, and these signals would be sensitive to the puromycin treatment. However,  
319 detecting nascent PCNT polypeptides by anti-PCNT N-terminus antibody staining relies on  
320 multiple copies of polypeptides tethered to the translating ribosomes for generating detectable  
321 fluorescent signals. Therefore, this method is biased toward detecting the translating *PCNT*  
322 polysomes at later stages of translation elongation, when multiple ribosomes have been loaded  
323 and multiple copies of PCNT polypeptides are available for antibody detection. This method,  
324 however, would likely fail to detect anti-PCNT N-terminus signals on the mRNA that just started  
325 to be translated. We speculate that this could explain why not all centrosomally localized *PCNT*  
326 mRNAs showed anti-PCNT N-terminus signals, although most of these *PCNT* mRNAs would  
327 shift away from the centrosome upon the puromycin or harringtonine treatment (Figure 4).

328

### 329 **Significance of co-translational targeting of PCNT to the centrosome during mitosis**

330 What might be the biological significance of co-translational targeting of unusually large proteins  
331 such as PCNT or ASPM to the centrosome during mitosis? In the case of PCNT, we propose  
332 three possible mutually inclusive reasons. First, since PCNT has been placed upstream as a  
333 scaffold to initiate centrosome maturation (Lee & Rhee, 2011) and to help recruit other PCM  
334 components, including NEDD1, CEP192, and CDK5RAP2 (Lawo et al., 2012), it is critical to  
335 have optimal amounts of PCNT incorporated at the centrosome early during mitosis. As a  
336 polysome can synthesize multiple copies of polypeptides from a single mRNA template,  
337 mechanistically coupling translation and translocation of polysomes toward the destination of  
338 the protein being synthesized can maximize efficiency of protein production and delivery,

339 especially for large proteins such as PCNT, which requires 10-20 minutes to synthesize.  
340 Therefore, using this co-translational targeting mechanism can enable the cell to overcome the  
341 kinetics challenge of generating and incorporating the unusually large PCNT to the centrosome  
342 efficiently before metaphase. Second, generating PCNT proteins elsewhere in the cell might be  
343 deleterious. For example, non-centrosomal accumulation of PCNT might recruit other PCM  
344 components to the unwanted locations, resulting in ectopic PCM assembly; co-translational  
345 targeting of PCNT on defined microtubule tracks through the dynein motor can help confine  
346 most full-length PCNT proteins to the centrosome. Third, co-translational targeting of nascent  
347 PCNT polypeptides might be an integrated part of mitotic PCM expansion. Akin to the co-  
348 translational targeting of membrane and secreted proteins to the endoplasmic reticulum (ER),  
349 where the translating nascent polypeptides undergo protein folding and post-translational  
350 modifications in the ER lumen (Bergman & Kuehl, 1979; W. Chen, Helenius, Braakman, &  
351 Helenius, 1995), co-translational targeting of nascent PCNT polypeptides might promote their  
352 proper folding and complex formation near the PCM, thereby facilitating integration into the  
353 expanding PCM during early mitosis. Future experiments specifically perturbing this co-  
354 translational targeting process should help distinguish these hypotheses.

355

### 356 **Mechanism of co-translational targeting**

357 How are the polysomes actively translating PCNT or ASPM transported to the centrosome? In  
358 the case of PCNT, previous studies have shown that PCNT protein is transported to the  
359 centrosome through its interaction with cytoplasmic dynein (Purohit et al., 1999; Young et al.,  
360 2000), specifically through the dynein light intermediate chain 1 (LIC1) (Tynan et al., 2000).  
361 Moreover, the LIC1-interacting domain on PCNT is mapped within ~580 amino acids located in  
362 the N-terminal half of PCNT (Tynan et al., 2000). Based on these findings, we propose a model  
363 in which the partially translated PCNT nascent polypeptide starts to interact with the dynein



364 motor complex once the LIC1-interacting domain in the N-terminal half of PCNT is synthesized  
365 and folded, as early stages of protein folding can proceed quickly and co-translationally  
366 (Fedorov & Baldwin, 1997; Komar, Kommer, Krashennnikov, & Spirin, 1997; Ptitsyn, 1995;  
367 Roder & Colon, 1997). Subsequently, this nascent polypeptide-dynein interaction allows the  
368 entire polysome, which is still actively translating *PCNT* mRNA, to be transported along the  
369 microtubule toward the centrosome (Figure 7). Alternatively, it is also possible that the coupling  
370 of the polysome to the motor complex is mediated through the ribosome-dynein interaction. If  
371 this was the case, additional components/adaptors would need to be involved in the interaction  
372 to differentiate the ribosomes translating *PCNT* mRNA from the ones translating other  
373 transcripts. One of the above mechanisms (i.e., via interaction through the nascent chain or  
374 ribosome itself) may also be used to mediate the co-translational transport of *ASPM*  
375 mRNA/polysomes to the mitotic spindle poles. Mapping the binding domains on both the motor  
376 and cargo sides, identifying the cargo adapter(s) that mediates the interaction, and testing the  
377 potential regulatory roles of mitotic kinases are important next steps to dissect the mechanisms  
378 underlying this co-translational protein targeting process.

379

### 380 **Mitotic translation regulation of PCNT**

381 Our data also underscore the importance of active translation of *PCNT* mRNA during early  
382 mitosis for the centrosome to gain the optimal level of PCNT because (1) during the G2/M  
383 transition, *PCNT* mRNA levels remain largely constant, but the centrosomal PCNT protein levels  
384 increase ~2-fold in 25 minutes after the onset of mitosis; (2) inhibiting translation briefly during  
385 early mitosis—e.g., 2 minutes of puromycin treatment in prophase or prometaphase—is  
386 sufficient to substantially reduce the amount of PCNT proteins incorporated at the centrosomes  
387 (Figure 5).

388

389 It is still unclear how the translation activation of *PCNT* mRNA is regulated during early mitosis.  
390 Previous studies show that translation is globally repressed during mitosis (Bonneau &  
391 Sonenberg, 1987; Fan & Penman, 1970; Pyronnet, Pradayrol, & Sonenberg, 2000) and this  
392 global translation repression is accompanied by the translation activation of a subset of  
393 transcripts through a cap-independent translation initiation mediated by internal ribosome entry  
394 sites (IRESes) (Cornelis et al., 2000; Marash et al., 2008; Pyronnet et al., 2000; Qin & Sarnow,  
395 2004; Ramirez-Valle, Badura, Braunstein, Narasimhan, & Schneider, 2010; Schepens et al.,  
396 2007; Wilker et al., 2007). However, a recent study has challenged this view of IRES-dependent  
397 translation during mitosis and instead finds that canonical, cap-dependent translation still  
398 dominates in mitosis as in interphase (Shuda et al., 2015). Therefore, to elucidate the  
399 mechanism underlying the translation upregulation of *PCNT* mRNA during early mitosis,  
400 determining if this process is a cap- and/or IRES-dependent process might be a first logical  
401 step. In addition, our recent study has linked GLE1, a multifunctional regulator of DEAD-box  
402 RNA helicases, to the regulation of *PCNT* levels at the centrosome (Jao, Akef, & Wente, 2017).  
403 Since all known functions of GLE1 are to modulate the activities of DEAD-box helicases in  
404 mRNA export and translation (Alcazar-Roman, Tran, Guo, & Wente, 2006; Bolger, Folkmann,  
405 Tran, & Wente, 2008; Bolger & Wente, 2011; Weirich et al., 2006), it is worth elucidating  
406 whether translation upregulation of *PCNT* mRNA during mitosis is regulated through the role of  
407 GLE1 in modulating certain DEAD-box helicases involved in translation control such as DDX3  
408 (H. H. Chen, Yu, & Tarn, 2016; Lai, Lee, & Tarn, 2008; Soto-Rifo et al., 2012).  
409  
410 In summary, the work presented here shows that incorporating *PCNT* into the PCM during  
411 centrosome maturation is at least in part mediated by upregulation of *PCNT* translation during  
412 the G2/M transition and the co-translational targeting of translating *PCNT* polysomes toward the  
413 centrosome during early mitosis. Efforts so far on elucidating the mechanism underlying

414 centrosome maturation has focused for the most part on the interplay of protein-protein  
415 interactions and post-translational modifications (e.g., phosphorylation) of different PCM  
416 components. However, our study suggests that a spatiotemporal coupling between the active  
417 translation machinery and the motor-based transport may represent a new layer of control over  
418 centrosome maturation. Our work also suggests that spatially restricted mRNA localization and  
419 translation are not limited to early embryos or specialized cells (e.g., polarized cells such as  
420 neurons). We anticipate that co-translational protein targeting to subcellular compartments  
421 beyond the centrosome may prove to be a recurrent cellular strategy to synthesize and deliver  
422 certain cytoplasmic proteins to the right place at the right time. This regulatory process might  
423 represent an underappreciated, universal protein targeting mechanism, in parallel to the  
424 evolutionarily conserved co-translational targeting of secreted and membrane proteins to the ER  
425 for the secretory pathway.

426 **Materials and Methods**

427 **Compounds**

428 RO-3306 (4181, R&D Systems, Minneapolis, MN), ciliobrevin D (250401, MilliporeSigma,  
429 Burlington, MA), nocodazole (M1404, Sigma-Aldrich, St. Louis, MO), cytochalasin B  
430 (228090250, ACROS Organics, Geel, Belgium), emetine (324693, MilliporeSigma), puromycin  
431 (540222, MilliporeSigma), harringtonine (H0169, LKT Laboratories, St. Paul, MN).

432

433 **Antibodies**

434 Antibodies were purchased commercially: rabbit anti-PCNT N-terminus (1:500 or 1:1,000  
435 dilution, ab4448, Abcam, Cambridge, MA), anti-PCNT C-terminus (1:500 dilution, sc-28145,  
436 Santa Cruz Biotechnology Inc., Santa Cruz, CA), mouse anti- $\gamma$ -tubulin (1:1,000 dilution, Clone  
437 GTU-88, T6557, Sigma-Aldrich), sheep anti-digoxigenin-alkaline phosphatase antibody (1:5,000  
438 dilution, 11093274910, Roche Diagnostics, Mannheim, Germany), and sheep anti-digoxigenin-  
439 peroxidase antibody (1:500 dilution, 11207733910, Roche Diagnostics). Secondary antibodies  
440 were highly cross-adsorbed IgG (H+L) labeled with Alexa Fluor 488, 568, or 647 (1:500 dilution,  
441 all from Life Technologies, Carlsbad, CA).

442

443 **Zebrafish husbandry**

444 Wild-type NHGRI-1 fish (LaFave, Varshney, Vemulapalli, Mullikin, & Burgess, 2014) were bred  
445 and maintained using standard procedures (Westerfield, 2000). Embryos were obtained by  
446 natural spawning and staged as described (Kimmel, Ballard, Kimmel, Ullmann, & Schilling,  
447 1995). All animal research was approved by the Institutional Animal Care and Use Committee,  
448 Office of Animal Welfare Assurance, University of California, Davis.

449

450 **Generation of *pcnt* knockout fish**

451 Disruption of zebrafish *pcnt* was generated by the CRISPR-Cas technology as described (Jao,  
452 Wente, & Chen, 2013). In brief, to generate guide RNA (gRNA) targeting *pcnt*, two  
453 complementary oligonucleotides (sequences in Supplementary Table 1) corresponding to a  
454 target sequence in the exon 2 of *pcnt* were annealed and cloned into pT7-gRNA plasmid to  
455 generate pT7-*pcnt*-gRNA. *pcnt* gRNA was generated by *in vitro* transcription using the  
456 MEGAshortscript T7 kit (AM1354, Thermo Fisher Scientific, Waltham, MA) with BamHI-  
457 linearized pT7-*pcnt*-gRNA as the template. Capped, zebrafish codon-optimized, double nuclear  
458 localization signal (nls)-tagged Cas9 RNA, *nls-zCas9-nls*, was synthesized by *in vitro*  
459 transcription using the mMACHINE T3 kit (AM1348, Thermo Fisher Scientific) with  
460 XbaI-linearized pT3TS-*nls-zCas9-nls* plasmid as the template.

461  
462 Microinjection of the mix of *pcnt* gRNA and *nls-zCas9-nls* RNA into zebrafish embryos (F0) was  
463 performed as described (Jao, Appel, & Wente, 2012). Pipettes were pulled on a micropipette  
464 puller (Model P-97, Sutter Instruments, Novato, CA). Injections were performed with an air  
465 injection apparatus (Pneumatic MPPI-2 Pressure Injector, Eugene, OR). Injected volume was  
466 calibrated with a microruler (typically ~1 nl of injection mix was injected per embryo). Injected F0  
467 embryos were raised and crossed with wild-type zebrafish to generate F1 offspring. Mutations in  
468 F1 offspring were screened by PCR amplifying the target region (primer sequences are in  
469 Supplementary Table 2), followed by 7.5% acrylamide gel electrophoresis to detect  
470 heteroduplexes and sequencing. Two frameshift mutant alleles of *pcnt*, *pcnt*<sup>Δup2</sup> and *pcnt*<sup>Δup5</sup>,  
471 were used in this study (Figure 1- figure supplement 1). Maternal-zygotic *pcnt* mutant embryos  
472 were generated by intercrosses of homozygous *pcnt*<sup>Δup2</sup> or *pcnt*<sup>Δup5</sup> fish.

473

474 **Inhibition of protein synthesis of zebrafish early embryos**

475 To inhibit protein synthesis in blastula-stage zebrafish embryos, one-cell stage embryos from  
476 wild-type NHGRI-1 intercrosses were injected with ~1 nl of Injection Buffer alone (10 mM  
477 HEPES, pH 7.0, 60 mM KCl, 3 mM MgCl<sub>2</sub>, and 0.05% phenol red) or with 300 μM puromycin in  
478 Injection Buffer. The embryos were fixed and analyzed after they developed to the 2-cell stage.

479

## 480 **Cell culture**

481 HeLa cells (ATCC® CCL-2™, a gift from Susan Wentz, Vanderbilt University, Nashville, TN, or  
482 a HeLa cell line stably expressing scFv-sfGFP-GB1 and NLS-tdPCP-tdTomato, a gift from  
483 Xiaowei Zhuang, Howard Hughes Medical Institute, Harvard University, Cambridge, MA; Wang  
484 et al., 2016) and Centrin-GFP RPE-1 cells (a gift from Alexey Khodjakov, Wadsworth Center,  
485 New York State Department of Health, Rensselaer Polytechnic Institute, Albany, NY; Uetake et  
486 al., 2007) were maintained in Dulbecco's Modification of Eagles Medium (10-017-CV, Corning,  
487 Tewksbury, MA) and Dulbecco's Modification of Eagles Medium/Ham's F-12 50/50 Mix (10-092-  
488 CV, Corning), respectively. All cell lines were supplemented with 10% fetal bovine serum (FBS)  
489 (12303C, lot no. 13G114, Sigma-Aldrich, St. Louis, MO), 1× Penicillin-Streptomycin (30-002 CI,  
490 Corning), and maintained in a humidified incubator with 5% CO<sub>2</sub> at 37°C. To inhibit cytoplasmic  
491 dynein activities, the cells were treated with 50 μM ciliobrevin D for 1 hr 25 min at 37°C.

492

493 Cell lines used in this study were not further authenticated after obtaining from the sources.

494 None of the cell lines used in this study were included in the list of commonly misidentified cell  
495 lines maintained by International Cell Line Authentication Committee.

496

## 497 **Cell synchronization**

498 **Early M phase.** Cells were synchronized by either double thymidine block using 2 mM

499 thymidine (J. Jackman & O'Connor, 2001) or by the RO-3306 protocol using 6 μM RO-3306

500 (Vassilev et al., 2006). For HeLa and Centrin-GFP RPE-1 cells, prophase and prometaphase  
501 cells were enriched in the cell population ~8 hr after the second release in the double thymidine  
502 block protocol, or 20-25 min after releasing cells from an 18-hr RO-3306 treatment.

503  
504 **G1 phase.** Cells were incubated with 6  $\mu$ M RO-3306 for 18 hr, washed out, and incubated in  
505 fresh media with 10% FBS for 30 min. Mitotic cells were collected after two firm slaps on the  
506 plate and were plated again to circular coverslips. The cells were grown for 6 hr; at this time,  
507 almost all cells are in G1 phase (i.e., two centrin dots per cell).

508  
509 **RNA *in situ* hybridization in zebrafish**

510 *In situ* hybridizations of zebrafish embryos were performed as described (Thisse & Thisse,  
511 2008). In brief, the DNA templates for making *in situ* RNA probes were first generated by RT-  
512 PCR using Trizol extracted total RNA from wild-type zebrafish oocytes as the template and  
513 gene-specific primers with T7 or T3 promoter sequence (sequences in Supplementary Table 2).  
514 Digoxigenin-labeled antisense RNA probes were then generated by *in vitro* transcription and  
515 purified by ethanol precipitation (sequences in Supplementary File 1). Blastula-stage embryos  
516 were fixed 4% paraformaldehyde in 1 $\times$  PBS with 0.1% Tween 20 (1 $\times$  PBS-Tw) overnight at 4°C,  
517 manually dechorionated, and pre-hybridized in hybridization media (65% formamide, 5 $\times$  SSC,  
518 0.1% Tween-20, 50  $\mu$ g/ml heparin, 500  $\mu$ g/ml Type X tRNA, 9.2 mM citric acid for 2-5 hr at  
519 70°C, and hybridized for ~18 hr with hybridization media containing diluted antisense probe at  
520 70°C. After hybridization, embryos were successively washed with hybridization media, 2 $\times$  SSC  
521 with 65% formamide, and 0.2 $\times$  SSC at 70°C, and finally washed with 1 $\times$  PBS-Tw at 25°C.  
522 Embryos were then incubated for 3-4 hr with blocking solution (2% sheep serum, 2 mg/ml BSA,  
523 0.1% Tween-20, 1 $\times$  PBS) at 25°C, and incubated ~18 hr with blocking buffer containing anti-  
524 digoxigenin-alkaline phosphatase antibody (1:5,000 dilution) at 4°C. Embryos were washed

525 successively with 1× PBS-Tw and AP Buffer (100 mM Tris, pH 9.5, 100 mM NaCl, 5 mM MgCl<sub>2</sub>,  
526 0.1% Tween-20) before staining with the NBT/BCIP substrates (11383213001/11383221001,  
527 Roche Diagnostics) in AP Buffer.

528

529 For combined RNA *in situ* hybridization and immunofluorescence to label both the RNA and  
530 centrosomes in zebrafish embryos, the RNA *in situ* hybridization process was performed as  
531 described above until the antibody labeling step: The embryos were incubated for ~18 hr with  
532 blocking solution (2% sheep serum, 2 mg/ml BSA, 0.1% Tween-20, 1× PBS) containing anti-  
533 digoxigenin-peroxidase (1:500 dilution) and anti- $\gamma$ -tubulin (1:1,000 dilution) antibodies at 4°C.  
534 Embryos were washed successively with 1× PBS-Tw and then incubated for ~18 hr with  
535 blocking solution containing Alexa Fluor 568 anti-mouse secondary antibody (1:500 dilution).  
536 After secondary antibody incubation, embryos were washed successively with 1× PBS and  
537 borate buffer (37.5 mM NaCl, 100 mM boric acid, pH 8.5) with 0.1% Tween-20. The RNA was  
538 visualized after tyramide amplification reaction by incubating embryos for 25 min in tyramide  
539 reaction buffer (100 mM borate buffer, 37.5 mM NaCl, 2% dextran sulfate, 0.1% Tween-20,  
540 0.003% H<sub>2</sub>O<sub>2</sub>, 0.15 mg/ml 4-iodophenol) containing diluted Alexa Fluor 488 tyramide at room  
541 temperature. The reaction was stopped by incubating embryos for 10 min with 100 mM glycine,  
542 pH 2.0 at room temperature, followed by successive washes with 1× PBS-Tw.

543

#### 544 **Fluorescent *in situ* hybridization with tyramide signal amplification (TSA) in human** 545 **cultured cells**

546 In brief, the DNA templates for making *in situ* RNA probes were first generated by RT-PCR  
547 using Trizol extracted total RNA from human 293T cells as the template and gene-specific  
548 primers with T7 or T3 promoter sequence (sequences in Supplementary Table 2). Digoxigenin-  
549 labeled antisense RNA probes were then generated by *in vitro* transcription and purified by



550 ethanol precipitation (sequences in Supplementary File 1). Cells were fixed for ~18 hr with 70%  
551 ethanol at 4°C, rehydrated with 2× SSC (0.3 M NaCl, 30 mM trisodium citrate, pH 7.0)  
552 containing 65% formamide at room temperature, pre-hybridized for 1 hr with hybridization media  
553 (65% formamide, 5× SSC, 0.1% Tween-20, 50 µg/ml heparin, 500 µg/ml Type X tRNA, 9.2 mM  
554 citric acid) at 70°C, and hybridized for ~18 hr with hybridization media containing diluted  
555 antisense probes at 70°C. Cells were then successively washed with hybridization media, 2×  
556 SSC with 65% formamide, and 0.2× SSC at 70°C, and finally washed with 1× PBS at room  
557 temperature. For tyramide signal amplification, cells were washed with 1× PBS, incubated for 20  
558 min with 100 mM glycine, pH 2.0, and washed with 1× PBS at room temperature. Cells were  
559 then incubated for 1 hr with blocking buffer (2% sheep serum, 2 mg/ml BSA, 0.1% Tween-20,  
560 1× PBS) at room temperature, and incubated ~18 hr with blocking buffer containing anti-  
561 digoxigenin-peroxidase antibody (1:500 dilution) at 4°C. Cells were washed successively with  
562 1× PBS and borate buffer (37.5 mM NaCl, 100 mM boric acid, pH 8.5) with 0.1% Tween-20 and  
563 incubated for 5 min in tyramide reaction buffer (100 mM borate buffer, 37.5 mM NaCl, 2%  
564 dextran sulfate, 0.1% Tween-20, 0.003% H<sub>2</sub>O<sub>2</sub>, 0.15 mg/ml 4-iodophenol) containing diluted  
565 Alexa Fluor tyramide at room temperature. Cells were washed successively with 1× quenching  
566 buffer (10 mM sodium ascorbate, 10 mM sodium azide, 5 mM Trolox, 1× PBS) and 1× PBS at  
567 room temperature. Coverslips were mounted using ProLong® Antifade media (P7481, Life  
568 Technologies).

569

570 **Sequential immunofluorescence (IF) and RNA single molecule fluorescent *in situ***  
571 **hybridization (smFISH)**

572 Sequential IF and smFISH were performed according to the manufacturer's protocol (LGC  
573 Biosearch Technologies, Petaluma, CA) with the following modifications: IF was performed first.  
574 Cells were fixed for 10 min in 4% paraformaldehyde in 1× PBS, washed twice with 1× PBS, and

575 permeabilized with 0.1% Triton X-100 in 1× PBS for 5 min at room temperature. Cells were  
576 washed once with 1× PBS and incubated with 70  $\mu$ l of diluted primary antibody in 1× PBS for 1  
577 hr at room temperature. Cells were washed three times with 1× PBS and incubated with 70  $\mu$ l of  
578 diluted secondary antibody in 1× PBS for 1 hr at room temperature. Cells were washed three  
579 times with 1× PBS and post-fixed for 10 min in 3.7% formaldehyde in 1× PBS at room  
580 temperature. For the smFISH process, cells were washed with Wash Buffer A, incubated with  
581 67  $\mu$ l of Hybridization Buffer containing 125 nM DNA probes labeled with Quasar 670  
582 (sequences in Supplementary File 1) for 6 hr at 37°C. Cells were then incubated with Wash  
583 Buffer A for 30 min at 37°C, Wash Buffer A containing 0.05  $\mu$ g/ml DAPI for 30 min at 37°C, and  
584 Wash Buffer B for 3 min at room temperature. Coverslips were mounted using ProLong®  
585 Antifade media (Life Technologies) and sealed with clear nail polish before imaging.

586

### 587 **Immunofluorescence**

588 Cells were fixed for 10 min in 4% paraformaldehyde in 1× PBS, washed twice with 1× PBS, and  
589 permeabilized with 0.5% Triton X-100 in 1× PBS for 5 min at room temperature. Cells were  
590 incubated with blocking solution (2% goat serum, 0.1% Triton X-100, and 10 mg/ml of bovine  
591 serum albumin in 1× PBS) for 1 hr at room temperature, incubated with blocking solution  
592 containing diluted primary antibody for 1 hr at room temperature. Cells were washed three times  
593 with 1× PBS and incubated with blocking solution containing diluted secondary antibody for 1 hr  
594 at room temperature. Cells were washed with 1× PBS and nuclei were counterstained with 0.05  
595  $\mu$ g/ml of DAPI in 1× PBS for 20 min at room temperature before mounting.

596

### 597 **EdU labeling**

598 S phase cells were detected by using the Click-iT™ EdU Imaging Kit (Life Technologies)  
599 according to the manufacturer's instruction. In brief, Centrin-GFP RPE-1 cells were grown on

600 12-mm acid-washed coverslips and pulse labeled with 10  $\mu$ M 5-ethynyl-2'-deoxyuridine (EdU)  
601 for 30 min at 37°C. The cells were then fixed for 10 min with 4% paraformaldehyde in 1× PBS at  
602 room temperature, washed twice with 1× PBS, and permeabilized for 20 min with 0.5% Triton X-  
603 100 in 1× PBS. Cells were then washed twice with 1× PBS and incubated with a Click-iT  
604 cocktail mixture containing Alexa Fluor® 488 or 594 azide for 30 min in the dark at room  
605 temperature.

606

### 607 **Microscopy**

608 Embryos subjected to *in situ* hybridization were mounted in a 35-mm glass bottom dish (P35G-  
609 1.5-10-C, MatTek, Ashland, MA) in 0.8% low melting point agarose and imaged using a stereo  
610 microscope (M165 FC, Leica, Wetzlar, Germany) with a Leica DFC7000 T digital camera.

611

612 Confocal microscopy was performed using either a Leica TCS SP8 laser-scanning confocal  
613 microscope system with 63×/1.40 or 100×/1.40 oil HC PL APO CS2 oil-immersion objectives  
614 and HyD detectors in resonant scanning mode, or a spinning disk confocal microscope system  
615 (Dragonfly, Andor Technology, Belfast, UK) housed within a wrap-around incubator (Okolab,  
616 Pozzuoli, Italy) with Leica 63×/1.40 or 100×/1.40 HC PL APO objectives and an iXon Ultra 888  
617 EMCCD camera for smFISH and live cell imaging (Andor Technology). Deconvolution was  
618 performed using either the Huygens Professional (Scientific Volume Imaging b.v., Hilversum,  
619 Netherlands) (for images captured on Leica SP8) or the Fusion software (Andor Technology)  
620 (for images captured on Andor Dragonfly).

621

### 622 **Quantification of smFISH data and PCNT levels at centrosomes**

623 To quantify the RNA distribution within the cell in 3D voxels, we used Imaris software (Bitplane,  
624 Belfast, UK) to fit the protein signal as surfaces and the mRNA signal as spots of different sizes

625 in deconvolved images of each confocal z-stack. The intensity of the mRNA signal in each spot  
626 is assumed to be proportional to the amount of mRNA in each spot and is used in lieu of mRNA  
627 units. The outline of the cell was obtained either from a transmitted light image or from the  
628 background in the pre-deconvolved image and was used to restrict fitting of both mRNA and  
629 protein signals to the cell of interest. The distance from each mRNA spot to each centrosome's  
630 center of mass was calculated and the mRNA signal was "assigned" to the closest centrosome.  
631 The mRNA spots were binned by distance to the centrosome and the intensities of the spots in  
632 each bin were added as a measure of the amount of mRNA at that distance. This was  
633 calculated for each cell and then averaged over all the cells for each condition. Thus, the graphs  
634 show average mRNA as a function of distance (binned in 0.5  $\mu\text{m}$  intervals).

635

636 To quantify PCNT intensities at the centrosome, we put the surfaces of the anti-PCNT signals fit  
637 on the deconvolved images over the original images and used the statistics function in Imaris  
638 (Bitplane) to obtain the intensity sum of the original images within the fit volume.

639

#### 640 **Live translation assay (SunTag/PP7 system)**

641 A HeLa cell line stably expressing scFv-sfGFP-GB1 and NLS-tdPCP-tdTomato was transfected  
642 with the SunTag/PP7 reporter plasmid pEF-24xV4-ODC-24xPP7 (Wang et al., 2016) using  
643 Lipofectamine 3000 transfection reagent (Life Technologies) according to the manufacturer's  
644 instruction. 12-18 hr after transfection, the medium was changed to 10% FBS/DMEM without  
645 phenol red before imaging.

646

#### 647 **Statistical analysis**

648 Statistical analysis was performed using the GraphPad Prism 7. Each exact  $n$  value is indicated  
649 in the corresponding figure or figure legend. Significance was assessed by performing an

650 unpaired two-sided Student's t-test, as indicated in individual figures. The experiments were not  
651 randomized. The investigators were not blinded to allocation during experiments and outcome  
652 assessment.

653 **Author Contributions**

654 Conceptualization, L.J.; Methodology, G.S., M.A., I.B., B.H., and L.J.; Software, I.B.; Formal  
655 Analysis, G.S., M.A., I.B., K.M., T.O., N.C., L.N.C., L.C., B.H., and L.J.; Investigation, G.S.,  
656 M.A., I.B., K.M., T.O., N.C., L.N.C., L.C., D.Y., and L.J.; Resources, I.B. and L.J.; Writing –  
657 Original Draft, G.S., M.A., I.B., and L.J.; Writing – Review & Editing, G.S., M.A., I.B., and L.J.;  
658 Visualization, I.B. and L.J.; Supervision, L.J.; Project administration, L.J.; Funding acquisition,  
659 L.J.

660 **Acknowledgement**

661 We thank Susan Wente for the HeLa cell line; Alexey Khodjakov for the Centrin-GFP RPE-1  
662 stable cell line; Xiaowei Zhuang for the SunTag/PP7 reporter plasmid pEF-24xV4-ODC-  
663 24xPP7, and the HeLa cell line stably expressing scFv-sfGFP-GB1 and NLS-tdPCP-tdTomato;  
664 Dena Leerberg and Bruce Draper for technical help on fluorescent *in situ* hybridization in  
665 zebrafish; Tom Glaser, Henry Ho, Frank McNally, Richard Tucker, and Mark Winey for critical  
666 reading of the manuscript; Emily Jao for help on digital illustrations. Experiments were  
667 performed in part through the use of UC Davis Health Sciences District Advanced Imaging  
668 Facility.

669 **References**

- 670 Alcazar-Roman, A. R., Tran, E. J., Guo, S., & Wenthe, S. R. (2006). Inositol hexakisphosphate  
671 and Gle1 activate the DEAD-box protein Dbp5 for nuclear mRNA export. *Nat. Cell Biol.*, 8(7),  
672 711-716. doi:10.1038/ncb1427
- 673 Anitha, A., Nakamura, K., Yamada, K., Iwayama, Y., Toyota, T., Takei, N., . . . Mori, N. (2009).  
674 Association studies and gene expression analyses of the DISC1-interacting molecules,  
675 pericentrin 2 (PCNT2) and DISC1-binding zinc finger protein (DBZ), with schizophrenia and with  
676 bipolar disorder. *Am J Med Genet B Neuropsychiatr Genet*, 150B(7), 967-976.  
677 doi:10.1002/ajmg.b.30926
- 678 Bahe, S., Stierhof, Y. D., Wilkinson, C. J., Leiss, F., & Nigg, E. A. (2005). Rootletin forms  
679 centriole-associated filaments and functions in centrosome cohesion. *J Cell Biol*, 171(1), 27-33.  
680 doi:10.1083/jcb.200504107
- 681 Baye, L. M., & Link, B. A. (2007). Interkinetic nuclear migration and the selection of neurogenic  
682 cell divisions during vertebrate retinogenesis. *J Neurosci*, 27(38), 10143-10152.  
683 doi:10.1523/JNEUROSCI.2754-07.2007
- 684 Bergman, L. W., & Kuehl, W. M. (1979). Formation of an intrachain disulfide bond on nascent  
685 immunoglobulin light chains. *J Biol Chem*, 254(18), 8869-8876.
- 686 Bolger, T. A., Folkmann, A. W., Tran, E. J., & Wenthe, S. R. (2008). The mRNA export factor  
687 Gle1 and inositol hexakisphosphate regulate distinct stages of translation. *Cell*, 134(4), 624-633.  
688 doi:10.1016/j.cell.2008.06.027
- 689 Bolger, T. A., & Wenthe, S. R. (2011). Gle1 is a multifunctional DEAD-box protein regulator that  
690 modulates Ded1 in translation initiation. *J Biol Chem*, 286(46), 39750-39759.  
691 doi:10.1074/jbc.M111.299321
- 692 Bonneau, A. M., & Sonenberg, N. (1987). Involvement of the 24-kDa cap-binding protein in  
693 regulation of protein synthesis in mitosis. *J Biol Chem*, 262(23), 11134-11139.
- 694 Bostrom, K., Wettsten, M., Boren, J., Bondjers, G., Wiklund, O., & Olofsson, S. O. (1986).  
695 Pulse-chase studies of the synthesis and intracellular transport of apolipoprotein B-100 in Hep  
696 G2 cells. *J Biol Chem*, 261(29), 13800-13806.
- 697 Chen, C. T., Hehnlly, H., Yu, Q., Farkas, D., Zheng, G., Redick, S. D., . . . Doxsey, S. (2014). A  
698 unique set of centrosome proteins requires pericentrin for spindle-pole localization and spindle  
699 orientation. *Curr Biol*, 24(19), 2327-2334. doi:10.1016/j.cub.2014.08.029
- 700 Chen, H. H., Yu, H. I., & Tarn, W. Y. (2016). DDX3 Modulates Neurite Development via  
701 Translationally Activating an RNA Regulon Involved in Rac1 Activation. *J Neurosci*, 36(38),  
702 9792-9804. doi:10.1523/JNEUROSCI.4603-15.2016
- 703 Chen, W., Helenius, J., Braakman, I., & Helenius, A. (1995). Cotranslational folding and  
704 calnexin binding during glycoprotein synthesis. *Proc Natl Acad Sci U S A*, 92(14), 6229-6233.



- 705 Conduit, P. T., Feng, Z., Richens, J. H., Baumbach, J., Wainman, A., Bakshi, S. D., . . . Raff, J.  
706 W. (2014). The centrosome-specific phosphorylation of Cnn by Polo/Plk1 drives Cnn scaffold  
707 assembly and centrosome maturation. *Dev Cell*, *28*(6), 659-669.  
708 doi:10.1016/j.devcel.2014.02.013
- 709 Conduit, P. T., Richens, J. H., Wainman, A., Holder, J., Vicente, C. C., Pratt, M. B., . . . Raff, J.  
710 W. (2014). A molecular mechanism of mitotic centrosome assembly in Drosophila. *Elife*, *3*,  
711 e03399. doi:10.7554/eLife.03399
- 712 Conduit, P. T., Wainman, A., & Raff, J. W. (2015). Centrosome function and assembly in animal  
713 cells. *Nat Rev Mol Cell Biol*, *16*(10), 611-624. doi:10.1038/nrm4062
- 714 Cornelis, S., Bruynooghe, Y., Denecker, G., Van Huffel, S., Tinton, S., & Beyaert, R. (2000).  
715 Identification and characterization of a novel cell cycle-regulated internal ribosome entry site.  
716 *Mol Cell*, *5*(4), 597-605.
- 717 Delaval, B., & Doxsey, S. J. (2010). Pericentrin in cellular function and disease. *J Cell Biol*,  
718 *188*(2), 181-190. doi:10.1083/jcb.200908114
- 719 Doxsey, S. J., Stein, P., Evans, L., Calarco, P. D., & Kirschner, M. (1994). Pericentrin, a highly  
720 conserved centrosome protein involved in microtubule organization. *Cell*, *76*(4), 639-650.
- 721 Fan, H., & Penman, S. (1970). Regulation of protein synthesis in mammalian cells. II. Inhibition  
722 of protein synthesis at the level of initiation during mitosis. *J Mol Biol*, *50*(3), 655-670.
- 723 Fedorov, A. N., & Baldwin, T. O. (1997). Cotranslational protein folding. *J Biol Chem*, *272*(52),  
724 32715-32718.
- 725 Firestone, A. J., Weinger, J. S., Maldonado, M., Barlan, K., Langston, L. D., O'Donnell, M., . . .  
726 Chen, J. K. (2012). Small-molecule inhibitors of the AAA+ ATPase motor cytoplasmic dynein.  
727 *Nature*, *484*(7392), 125-129. doi:10.1038/nature10936
- 728 Fry, A. M., Mayor, T., Meraldi, P., Stierhof, Y. D., Tanaka, K., & Nigg, E. A. (1998). C-Nap1, a  
729 novel centrosomal coiled-coil protein and candidate substrate of the cell cycle-regulated protein  
730 kinase Nek2. *J Cell Biol*, *141*(7), 1563-1574.
- 731 Gavet, O., & Pines, J. (2010). Progressive activation of CyclinB1-Cdk1 coordinates entry to  
732 mitosis. *Dev Cell*, *18*(4), 533-543. doi:10.1016/j.devcel.2010.02.013
- 733 Gopalakrishnan, J., Mennella, V., Blachon, S., Zhai, B., Smith, A. H., Megraw, T. L., . . . Avidor-  
734 Reiss, T. (2011). Sas-4 provides a scaffold for cytoplasmic complexes and tethers them in a  
735 centrosome. *Nat Commun*, *2*, 359. doi:10.1038/ncomms1367
- 736 Gould, R. R., & Borisy, G. G. (1977). The pericentriolar material in Chinese hamster ovary cells  
737 nucleates microtubule formation. *J Cell Biol*, *73*(3), 601-615.
- 738 Griffith, E., Walker, S., Martin, C. A., Vagnarelli, P., Stiff, T., Vernay, B., . . . O'Driscoll, M.  
739 (2008). Mutations in pericentrin cause Seckel syndrome with defective ATR-dependent DNA  
740 damage signaling. *Nat Genet*, *40*(2), 232-236. doi:10.1038/ng.2007.80

- 741 Hamill, D. R., Severson, A. F., Carter, J. C., & Bowerman, B. (2002). Centrosome maturation  
742 and mitotic spindle assembly in *C. elegans* require SPD-5, a protein with multiple coiled-coil  
743 domains. *Dev Cell*, 3(5), 673-684.
- 744 Haren, L., Stearns, T., & Luders, J. (2009). Plk1-dependent recruitment of gamma-tubulin  
745 complexes to mitotic centrosomes involves multiple PCM components. *PLoS One*, 4(6), e5976.  
746 doi:10.1371/journal.pone.0005976
- 747 Huang, M. T. (1975). Harringtonine, an inhibitor of initiation of protein biosynthesis. *Mol*  
748 *Pharmacol*, 11(5), 511-519.
- 749 Ingolia, N. T., Lareau, L. F., & Weissman, J. S. (2011). Ribosome profiling of mouse embryonic  
750 stem cells reveals the complexity and dynamics of mammalian proteomes. *Cell*, 147(4), 789-  
751 802. doi:10.1016/j.cell.2011.10.002
- 752 Ito, A., & Goshima, G. (2015). Microcephaly protein Asp focuses the minus ends of spindle  
753 microtubules at the pole and within the spindle. *J Cell Biol*, 211(5), 999-1009.  
754 doi:10.1083/jcb.201507001
- 755 Jackman, J., & O'Connor, P. M. (2001). Methods for synchronizing cells at specific stages of the  
756 cell cycle. *Curr Protoc Cell Biol*, Chapter 8, Unit 8 3. doi:10.1002/0471143030.cb0803s00
- 757 Jackman, M., Lindon, C., Nigg, E. A., & Pines, J. (2003). Active cyclin B1-Cdk1 first appears on  
758 centrosomes in prophase. *Nat Cell Biol*, 5(2), 143-148. doi:10.1038/ncb918
- 759 Jao, L. E., Akef, A., & Wente, S. R. (2017). A role for Gle1, a regulator of DEAD-box RNA  
760 helicases, at centrosomes and basal bodies. *Mol Biol Cell*, 28(1), 120-127.  
761 doi:10.1091/mbc.E16-09-0675
- 762 Jao, L. E., Appel, B., & Wente, S. R. (2012). A zebrafish model of lethal congenital contracture  
763 syndrome 1 reveals Gle1 function in spinal neural precursor survival and motor axon  
764 arborization. *Development*, 139(7), 1316-1326. doi:10.1242/dev.074344
- 765 Jao, L. E., Wente, S. R., & Chen, W. (2013). Efficient multiplex biallelic zebrafish genome  
766 editing using a CRISPR nuclease system. *Proc Natl Acad Sci U S A*, 110(34), 13904-13909.  
767 doi:10.1073/pnas.1308335110
- 768 Jiang, K., Rezabkova, L., Hua, S., Liu, Q., Capitani, G., Altelaar, A. F. M., . . . Akhmanova, A.  
769 (2017). Microtubule minus-end regulation at spindle poles by an ASPM-katanin complex. *Nat*  
770 *Cell Biol*, 19(5), 480-492. doi:10.1038/ncb3511
- 771 Jimenez, A., Carrasco, L., & Vazquez, D. (1977). Enzymic and nonenzymic translocation by  
772 yeast polysomes. Site of action of a number of inhibitors. *Biochemistry*, 16(21), 4727-4730.
- 773 Joukov, V., Walter, J. C., & De Nicolo, A. (2014). The Cep192-organized aurora A-Plk1 cascade  
774 is essential for centrosome cycle and bipolar spindle assembly. *Mol Cell*, 55(4), 578-591.  
775 doi:10.1016/j.molcel.2014.06.016

- 776 Kemp, C. A., Kopish, K. R., Zipperlen, P., Ahringer, J., & O'Connell, K. F. (2004). Centrosome  
777 maturation and duplication in *C. elegans* require the coiled-coil protein SPD-2. *Dev Cell*, *6*(4),  
778 511-523.
- 779 Khodjakov, A., & Rieder, C. L. (1999). The sudden recruitment of gamma-tubulin to the  
780 centrosome at the onset of mitosis and its dynamic exchange throughout the cell cycle, do not  
781 require microtubules. *J Cell Biol*, *146*(3), 585-596.
- 782 Kimmel, C. B., Ballard, W. W., Kimmel, S. R., Ullmann, B., & Schilling, T. F. (1995). Stages of  
783 embryonic development of the zebrafish. *Dev Dyn*, *203*(3), 253-310.  
784 doi:10.1002/aja.1002030302
- 785 Kinoshita, K., Noetzel, T. L., Pelletier, L., Mechtler, K., Drechsel, D. N., Schwager, A., . . .  
786 Hyman, A. A. (2005). Aurora A phosphorylation of TACC3/maskin is required for centrosome-  
787 dependent microtubule assembly in mitosis. *J Cell Biol*, *170*(7), 1047-1055.  
788 doi:10.1083/jcb.200503023
- 789 Komar, A. A., Kommer, A., Krasheninnikov, I. A., & Spirin, A. S. (1997). Cotranslational folding  
790 of globin. *J Biol Chem*, *272*(16), 10646-10651.
- 791 LaFave, M. C., Varshney, G. K., Vemulapalli, M., Mullikin, J. C., & Burgess, S. M. (2014). A  
792 defined zebrafish line for high-throughput genetics and genomics: NHGRI-1. *Genetics*, *198*(1),  
793 167-170. doi:10.1534/genetics.114.166769
- 794 Lai, M. C., Lee, Y. H., & Tarn, W. Y. (2008). The DEAD-box RNA helicase DDX3 associates  
795 with export messenger ribonucleoproteins as well as tip-associated protein and participates in  
796 translational control. *Mol Biol Cell*, *19*(9), 3847-3858. doi:10.1091/mbc.E07-12-1264
- 797 Lawo, S., Hasegan, M., Gupta, G. D., & Pelletier, L. (2012). Subdiffraction imaging of  
798 centrosomes reveals higher-order organizational features of pericentriolar material. *Nat Cell*  
799 *Biol*, *14*(11), 1148-1158. doi:10.1038/ncb2591
- 800 Lecuyer, E., Yoshida, H., Parthasarathy, N., Alm, C., Babak, T., Cerovina, T., . . . Krause, H. M.  
801 (2007). Global analysis of mRNA localization reveals a prominent role in organizing cellular  
802 architecture and function. *Cell*, *131*(1), 174-187. doi:10.1016/j.cell.2007.08.003
- 803 Lee, K., & Rhee, K. (2011). PLK1 phosphorylation of pericentrin initiates centrosome maturation  
804 at the onset of mitosis. *J Cell Biol*, *195*(7), 1093-1101. doi:10.1083/jcb.201106093
- 805 Lenart, P., Petronczki, M., Steegmaier, M., Di Fiore, B., Lipp, J. J., Hoffmann, M., . . . Peters, J.  
806 M. (2007). The small-molecule inhibitor BI 2536 reveals novel insights into mitotic roles of polo-  
807 like kinase 1. *Curr Biol*, *17*(4), 304-315. doi:10.1016/j.cub.2006.12.046
- 808 Lerit, D. A., Jordan, H. A., Poulton, J. S., Fagerstrom, C. J., Galletta, B. J., Peifer, M., & Rusan,  
809 N. M. (2015). Interphase centrosome organization by the PLP-Cnn scaffold is required for  
810 centrosome function. *J Cell Biol*, *210*(1), 79-97. doi:10.1083/jcb.201503117
- 811 Marash, L., Liberman, N., Henis-Korenblit, S., Sivan, G., Reem, E., Elroy-Stein, O., & Kimchi, A.  
812 (2008). DAP5 promotes cap-independent translation of Bcl-2 and CDK1 to facilitate cell survival  
813 during mitosis. *Mol Cell*, *30*(4), 447-459. doi:10.1016/j.molcel.2008.03.018

- 814 Mardin, B. R., Agircan, F. G., Lange, C., & Schiebel, E. (2011). Plk1 controls the Nek2A-  
815 PP1gamma antagonism in centrosome disjunction. *Curr Biol*, *21*(13), 1145-1151.  
816 doi:10.1016/j.cub.2011.05.047
- 817 Mennella, V., Keszthelyi, B., McDonald, K. L., Chhun, B., Kan, F., Rogers, G. C., . . . Agard, D.  
818 A. (2012). Subdiffraction-resolution fluorescence microscopy reveals a domain of the  
819 centrosome critical for pericentriolar material organization. *Nat Cell Biol*, *14*(11), 1159-1168.  
820 doi:10.1038/ncb2597
- 821 Morisaki, T., Lyon, K., DeLuca, K. F., DeLuca, J. G., English, B. P., Zhang, Z., . . . Stasevich, T.  
822 J. (2016). Real-time quantification of single RNA translation dynamics in living cells. *Science*,  
823 *352*(6292), 1425-1429. doi:10.1126/science.aaf0899
- 824 Moritz, M., Braunfeld, M. B., Sedat, J. W., Alberts, B., & Agard, D. A. (1995). Microtubule  
825 nucleation by gamma-tubulin-containing rings in the centrosome. *Nature*, *378*(6557), 638-640.  
826 doi:10.1038/378638a0
- 827 Numata, S., Iga, J., Nakataki, M., Tayoshi, S., Tanahashi, T., Itakura, M., . . . Ohmori, T. (2009).  
828 Positive association of the pericentrin (PCNT) gene with major depressive disorder in the  
829 Japanese population. *J Psychiatry Neurosci*, *34*(3), 195-198.
- 830 Pichon, X., Bastide, A., Safieddine, A., Chouaib, R., Samacoits, A., Basyuk, E., . . . Bertrand, E.  
831 (2016). Visualization of single endogenous polysomes reveals the dynamics of translation in live  
832 human cells. *J Cell Biol*, *214*(6), 769-781. doi:10.1083/jcb.201605024
- 833 Piehl, M., Tulu, U. S., Wadsworth, P., & Cassimeris, L. (2004). Centrosome maturation:  
834 measurement of microtubule nucleation throughout the cell cycle by using GFP-tagged EB1.  
835 *Proc Natl Acad Sci U S A*, *101*(6), 1584-1588. doi:10.1073/pnas.0308205100
- 836 Ptitsyn, O. B. (1995). Molten globule and protein folding. *Adv Protein Chem*, *47*, 83-229.
- 837 Purohit, A., Tynan, S. H., Vallee, R., & Doxsey, S. J. (1999). Direct interaction of pericentrin with  
838 cytoplasmic dynein light intermediate chain contributes to mitotic spindle organization. *J Cell*  
839 *Biol*, *147*(3), 481-492.
- 840 Pyronnet, S., Pradayrol, L., & Sonenberg, N. (2000). A cell cycle-dependent internal ribosome  
841 entry site. *Mol Cell*, *5*(4), 607-616.
- 842 Qin, X., & Sarnow, P. (2004). Preferential translation of internal ribosome entry site-containing  
843 mRNAs during the mitotic cycle in mammalian cells. *J Biol Chem*, *279*(14), 13721-13728.  
844 doi:10.1074/jbc.M312854200
- 845 Ramirez-Valle, F., Badura, M. L., Braunstein, S., Narasimhan, M., & Schneider, R. J. (2010).  
846 Mitotic raptor promotes mTORC1 activity, G(2)/M cell cycle progression, and internal ribosome  
847 entry site-mediated mRNA translation. *Mol Cell Biol*, *30*(13), 3151-3164.  
848 doi:10.1128/MCB.00322-09
- 849 Rauch, A., Thiel, C. T., Schindler, D., Wick, U., Crow, Y. J., Ekici, A. B., . . . Reis, A. (2008).  
850 Mutations in the pericentrin (PCNT) gene cause primordial dwarfism. *Science*, *319*(5864), 816-  
851 819. doi:10.1126/science.1151174

- 852 Ripoll, P., Pimpinelli, S., Valdivia, M. M., & Avila, J. (1985). A cell division mutant of *Drosophila*  
853 with a functionally abnormal spindle. *Cell*, *41*(3), 907-912.
- 854 Roder, H., & Colon, W. (1997). Kinetic role of early intermediates in protein folding. *Curr Opin*  
855 *Struct Biol*, *7*(1), 15-28.
- 856 Schepens, B., Tinton, S. A., Bruynooghe, Y., Parthoens, E., Haegman, M., Beyaert, R., &  
857 Cornelis, S. (2007). A role for hnRNP C1/C2 and Unr in internal initiation of translation during  
858 mitosis. *EMBO J*, *26*(1), 158-169. doi:10.1038/sj.emboj.7601468
- 859 Shuda, M., Velasquez, C., Cheng, E., Cordek, D. G., Kwun, H. J., Chang, Y., & Moore, P. S.  
860 (2015). CDK1 substitutes for mTOR kinase to activate mitotic cap-dependent protein translation.  
861 *Proc Natl Acad Sci U S A*, *112*(19), 5875-5882. doi:10.1073/pnas.1505787112
- 862 Sonnen, K. F., Schermelleh, L., Leonhardt, H., & Nigg, E. A. (2012). 3D-structured illumination  
863 microscopy provides novel insight into architecture of human centrosomes. *Biol Open*, *1*(10),  
864 965-976. doi:10.1242/bio.20122337
- 865 Soto-Rifo, R., Rubilar, P. S., Limousin, T., de Breyne, S., Decimo, D., & Ohlmann, T. (2012).  
866 DEAD-box protein DDX3 associates with eIF4F to promote translation of selected mRNAs.  
867 *EMBO J*, *31*(18), 3745-3756. doi:10.1038/emboj.2012.220
- 868 Thisse, C., & Thisse, B. (2008). High-resolution in situ hybridization to whole-mount zebrafish  
869 embryos. *Nat Protoc*, *3*(1), 59-69. doi:10.1038/nprot.2007.514
- 870 Tungadi, E. A., Ito, A., Kiyomitsu, T., & Goshima, G. (2017). Human microcephaly ASPM protein  
871 is a spindle pole-focusing factor that functions redundantly with CDK5RAP2. *J Cell Sci*.  
872 doi:10.1242/jcs.203703
- 873 Uetake, Y., Loncarek, J., Nordberg, J. J., English, C. N., La Terra, S., Khodjakov, A., & Sluder,  
874 G. (2007). Cell cycle progression and de novo centriole assembly after centrosomal removal in  
875 untransformed human cells. *J Cell Biol*, *176*(2), 173-182. doi:10.1083/jcb.200607073
- 876 Vassilev, L. T., Tovar, C., Chen, S., Knezevic, D., Zhao, X., Sun, H., . . . Chen, L. (2006).  
877 Selective small-molecule inhibitor reveals critical mitotic functions of human CDK1. *Proc Natl*  
878 *Acad Sci U S A*, *103*(28), 10660-10665. doi:10.1073/pnas.0600447103
- 879 Wang, C., Han, B., Zhou, R., & Zhuang, X. (2016). Real-Time Imaging of Translation on Single  
880 mRNA Transcripts in Live Cells. *Cell*, *165*(4), 990-1001. doi:10.1016/j.cell.2016.04.040
- 881 Weirich, C. S., Erzberger, J. P., Flick, J. S., Berger, J. M., Thorner, J., & Weis, K. (2006).  
882 Activation of the DExD/H-box protein Dbp5 by the nuclear-pore protein Gle1 and its coactivator  
883 InsP6 is required for mRNA export. *Nat. Cell Biol.*, *8*(7), 668-676. doi:10.1038/ncb1424
- 884 Westerfield, M. (2000). The zebrafish book. A guide for the laboratory use of zebrafish (*Danio*  
885 *rerio*). (4th ed.). Eugene, OR: Univ. of Oregon Press.
- 886 Wilker, E. W., van Vugt, M. A., Artim, S. A., Huang, P. H., Petersen, C. P., Reinhardt, H. C., . . .  
887 Yaffe, M. B. (2007). 14-3-3sigma controls mitotic translation to facilitate cytokinesis. *Nature*,  
888 *446*(7133), 329-332. doi:10.1038/nature05584

- 889 Woodruff, J. B., Wueseke, O., & Hyman, A. A. (2014). Pericentriolar material structure and  
890 dynamics. *Philos Trans R Soc Lond B Biol Sci*, 369(1650). doi:10.1098/rstb.2013.0459
- 891 Wu, B., Eliscovich, C., Yoon, Y. J., & Singer, R. H. (2016). Translation dynamics of single  
892 mRNAs in live cells and neurons. *Science*, 352(6292), 1430-1435. doi:10.1126/science.aaf1084
- 893 Yan, X., Hoek, T. A., Vale, R. D., & Tanenbaum, M. E. (2016). Dynamics of Translation of  
894 Single mRNA Molecules In Vivo. *Cell*, 165(4), 976-989. doi:10.1016/j.cell.2016.04.034
- 895 Zheng, Y., Wong, M. L., Alberts, B., & Mitchison, T. (1995). Nucleation of microtubule assembly  
896 by a gamma-tubulin-containing ring complex. *Nature*, 378(6557), 578-583.  
897 doi:10.1038/378578a0
- 898 Zimmerman, W. C., Sillibourne, J., Rosa, J., & Doxsey, S. J. (2004). Mitosis-specific anchoring  
899 of gamma tubulin complexes by pericentrin controls spindle organization and mitotic entry. *Mol*  
900 *Biol Cell*, 15(8), 3642-3657. doi:10.1091/mbc.E03-11-0796



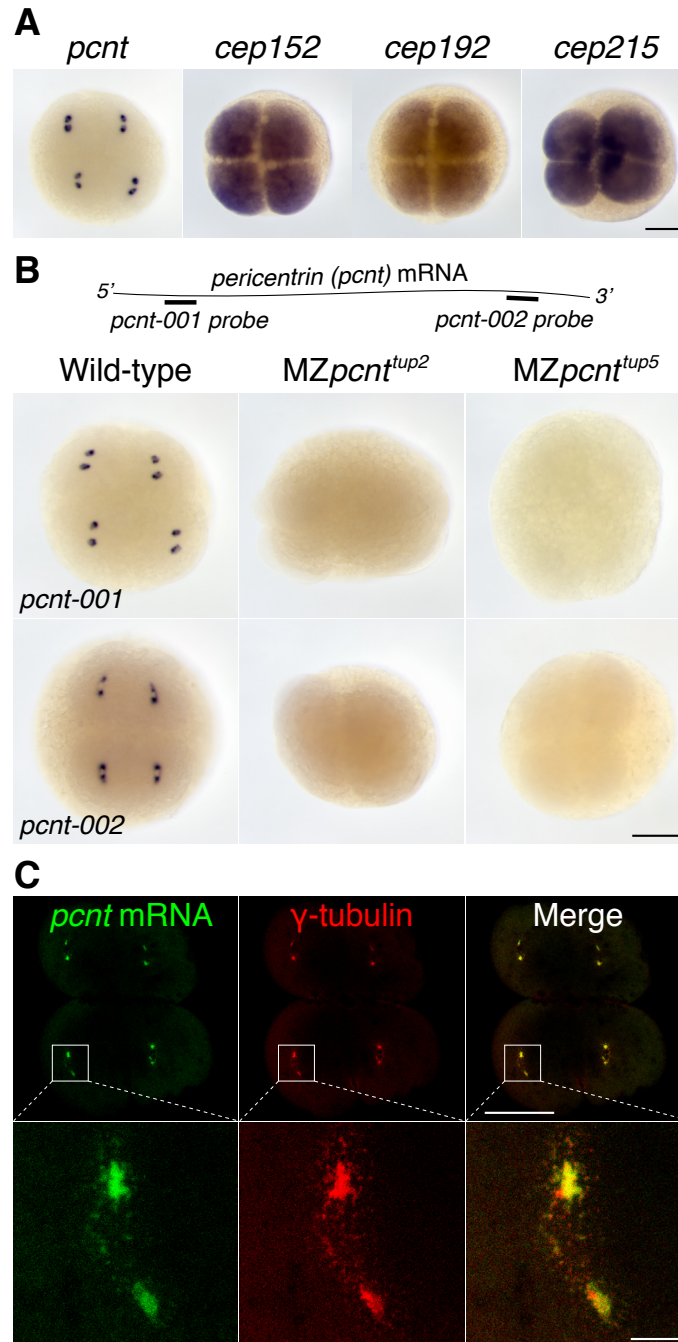

**Figure 1. *Pericentrin (pcnt)* mRNA is localized to centrosomes in early zebrafish embryos.** (A) RNA *in situ* hybridization of transcripts of different PCM components in 4-cell stage zebrafish embryos. Note that while the mRNA of *cep152*, *cep192*, and *cep215* displayed a pan-cellular distribution, *pcnt* mRNA was concentrated at two distinct foci in each cell. (B) RNA *in situ* hybridization showed similar dot-like patterns of *pcnt* transcripts with two non-overlapping antisense probes. The signals were lost in two maternal-zygotic (MZ) *pcnt* mutants. (C) Fluorescent RNA *in situ* hybridization and anti- $\gamma$ -tubulin co-staining demonstrated the centrosomal localization of *pcnt* mRNA. Scale bars: 200  $\mu$ m or 25  $\mu$ m (inset in C).

The following figure supplement is available for **Figure 1**:

**Zebrafish *pcnt* mutant alleles- *pcnt*<sup>tup2</sup> and *pcnt*<sup>tup5</sup>**

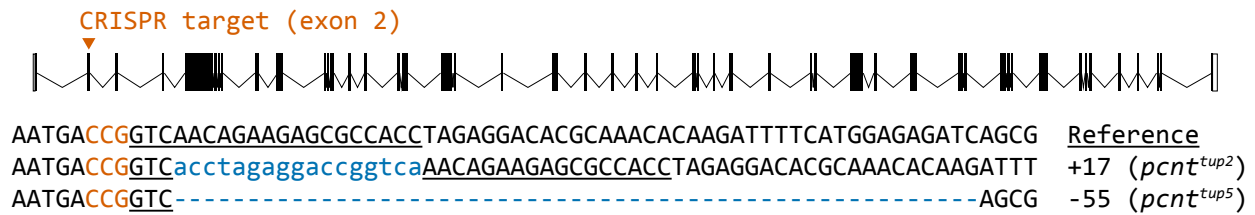

**Figure 1- figure supplement 1. Sequences of two Cas9-induced frameshift mutations (alleles *pcnt*<sup>tup2</sup> and *pcnt*<sup>tup5</sup>) in the zebrafish *pcnt* gene.** The wild-type reference sequence is on the top. The guide RNA targets the exon 2 of the *pcnt* transcript (encoded by ENSDARG00000033012). The target site is underlined and the proto-spacer-adjacent motif (PAM) is in orange (on the reverse strand). Insertions and deletions (indels) are indicated by blue lowercase letters and dashes, respectively. The net change of each indel mutation is noted at the right of each sequence (+, insertion; -, deletion).



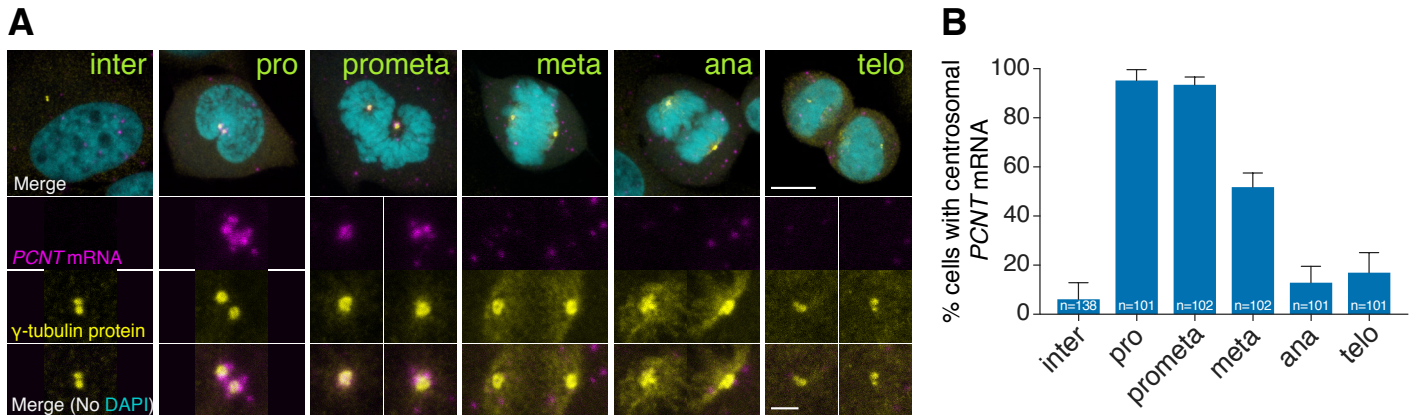

**Figure 2. Human *PCNT* mRNA is localized to centrosomes during early mitosis.** (A) Synchronized HeLa cells were subjected to fluorescent *in situ* hybridization with tyramide signal amplification against *PCNT* mRNA and anti- $\gamma$ -tubulin immunostaining. Note that *PCNT* mRNA was localized to centrosomes predominantly during prophase (pro) and prometaphase (prometa). (B) Quantification of *PCNT* mRNA localization at centrosomes during cell cycle stages from three experimental replicates. Data are represented as mean with standard deviation (SD) with the total number of cells analyzed indicated. Scale bars: 10  $\mu$ m and 2  $\mu$ m (inset).

The following figure supplements are available for **Figure 2**:

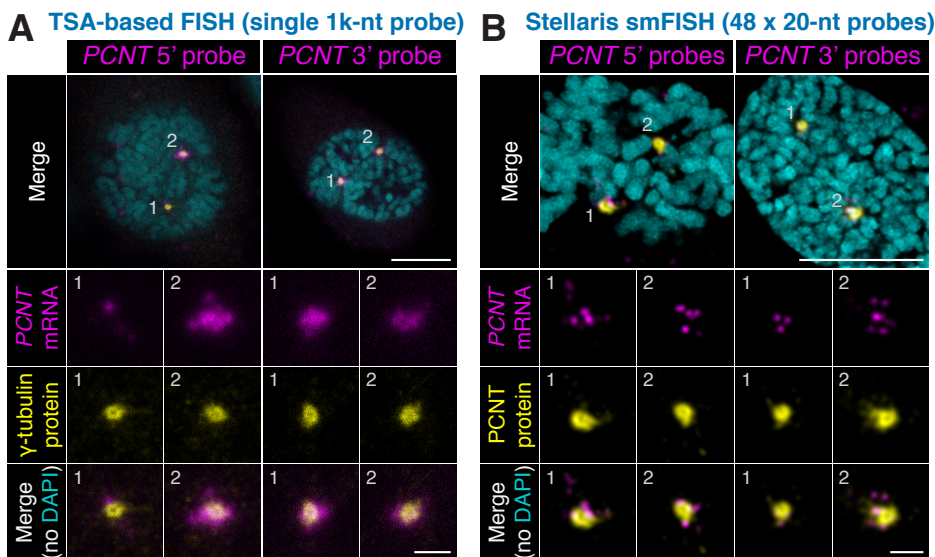

**Figure 2- figure supplement 1. Non-overlapping antisense probes and two independent *in situ* methods confirm centrosomal localization of *PCNT* mRNA during early mitosis.** HeLa cells were subjected to fluorescent *in situ* hybridization (FISH) with tyramide signal amplification (TSA) against *PCNT* mRNA with a 1,000-nt probe (A) or the Stellaris single-molecule FISH (smFISH) with a set of 48 20-nt fluorescent probes (B). Note that both methods (probing two distinct regions in each method) showed similar distributions of *PCNT* mRNA at centrosomes during early mitosis, with the Stellaris smFISH showing mRNA at near single-molecule resolution. Scale bars: 10  $\mu$ m and 2  $\mu$ m (inset).

**Zebrafish retina**

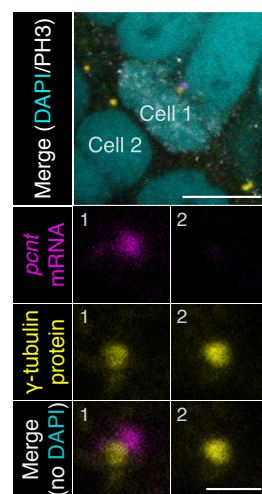

**Figure 2- figure supplement 2. Zebrafish *pcnt* mRNA is localized to centrosomes of mitotic retinal neuroepithelial cells *in vivo*.** Retinal neuroepithelial cells of 1 day old zebrafish were subjected to *pcnt* FISH, anti- $\gamma$ -tubulin, and anti-phospho-Histone H3 (PH3) immunostaining. Note that *pcnt* mRNA was localized to the centrosome of the mitotic (Cell 1, PH3<sup>+</sup>), but not of the non-mitotic cell (Cell 2). Scale bars: 10  $\mu$ m and 2  $\mu$ m (inset).

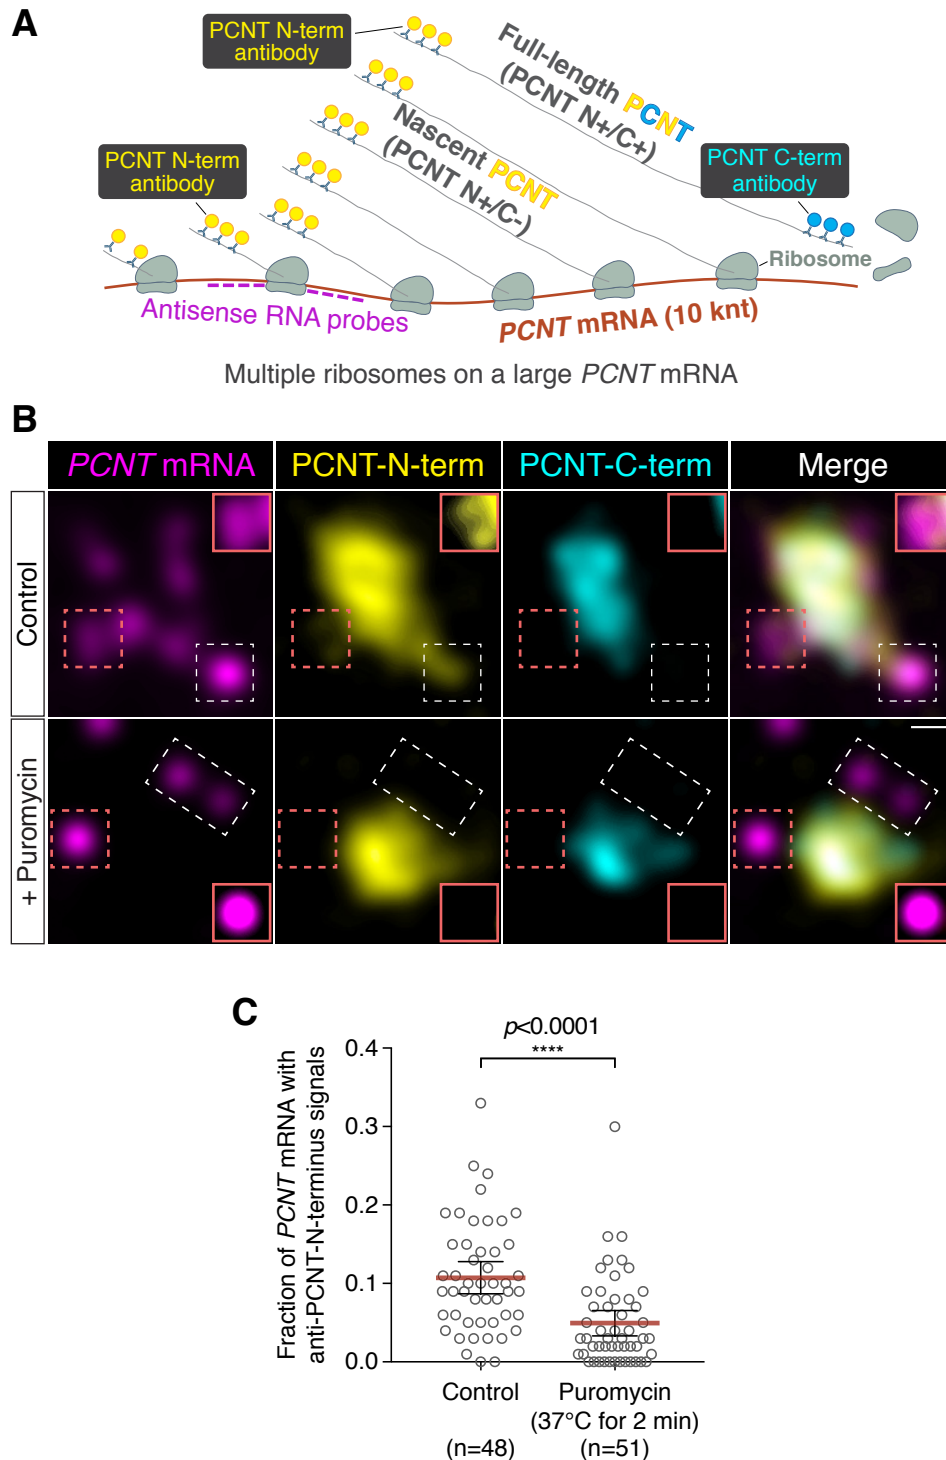

**Figure 3. Centrosomally localized PCNT mRNA undergoes active translation. (A)** A strategy of using smFISH and double immunofluorescence (IF) to distinguish between newly synthesized and full-length PCNT proteins. **(B)** Prometaphase HeLa cells were subjected to PCNT smFISH and anti-PCNT immunostaining against the N- and C-terminus of PCNT protein (PCNT-N-term and PCNT-C-term). Note that the putative active translation sites were labeled by PCNT-N-term IF and PCNT smFISH, but not by PCNT-C-term IF (top row). However, upon the puromycin treatment (300  $\mu$ M for 2 minutes at 37°C, bottom row), PCNT-N-term IF signals were no longer colocalized with PCNT smFISH signals, indicating that those PCNT-N-term IF signals on RNA represent nascent PCNT polypeptides. Orange boxes show higher contrast of selected areas (dashed orange boxes) for better visualization. **(C)** PCNT smFISH signals between 1 and 3  $\mu$ m radius from the centrosome center were quantified for the presence of anti-PCNT-N-term IF signals with or without a short puromycin treatment. Data are represented as mean  $\pm$  95% CI (confidence intervals), with the number of cells analyzed indicated.  $p$  value was obtained with Student's t-test (two-tailed). Scale bar: 0.5  $\mu$ m.

The following figure supplements are available for **Figure 3**:

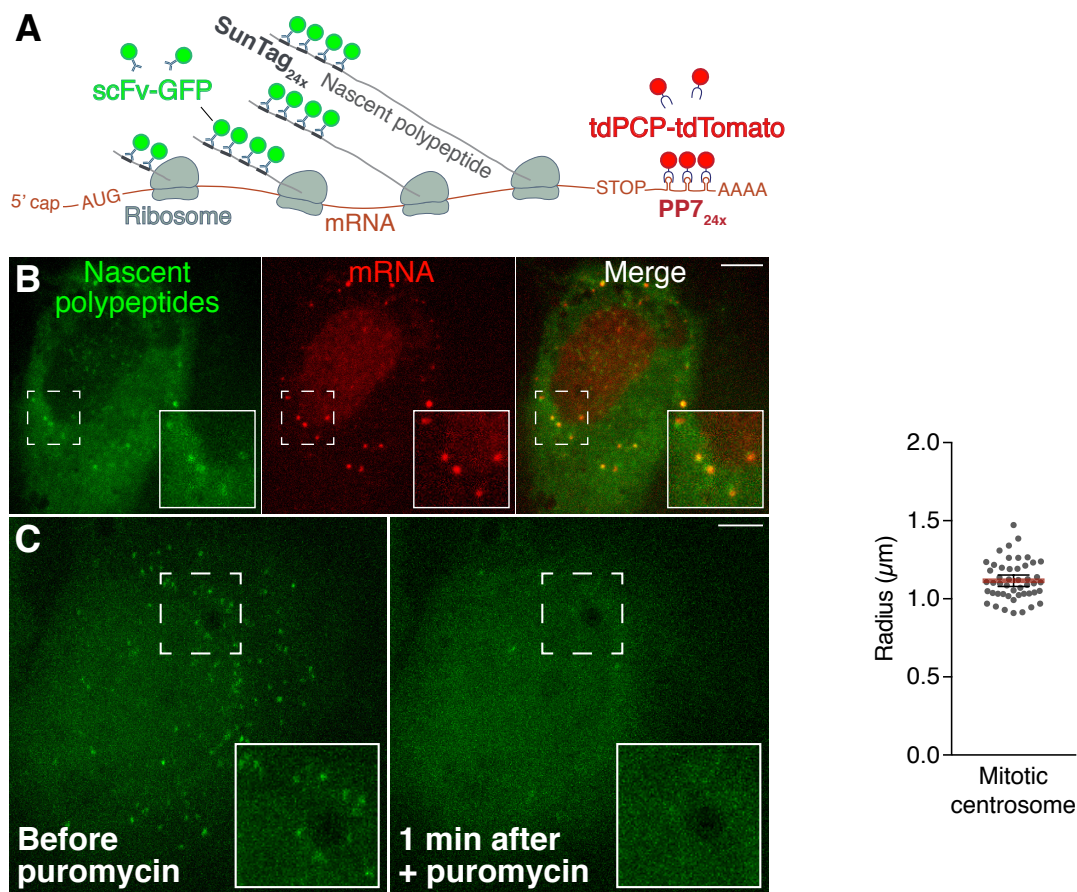

**Figure 3- figure supplement 1. Visualization of active translation in live cells using the SunTag/PP7 system.** (A) SunTag/PP7 system overview, adapted from Wang et al., 2016. (B) HeLa cells stably expressing scFv-GFP and tdPCP-tdTomato transfected with SunTag-ODC-PP7 reporter. Individual polysomes (GFP<sup>+</sup>) and mRNA (tdTomato<sup>+</sup>) were shown. (C) Translation foci in the same field before and after adding 300  $\mu\text{M}$  puromycin for 1 minute. Scale bars: 10  $\mu\text{m}$ .

**Figure 3- figure supplement 2. Mean radius of mitotic centrosomes of HeLa cells.** Data are represented as mean  $\pm$  95% CI.



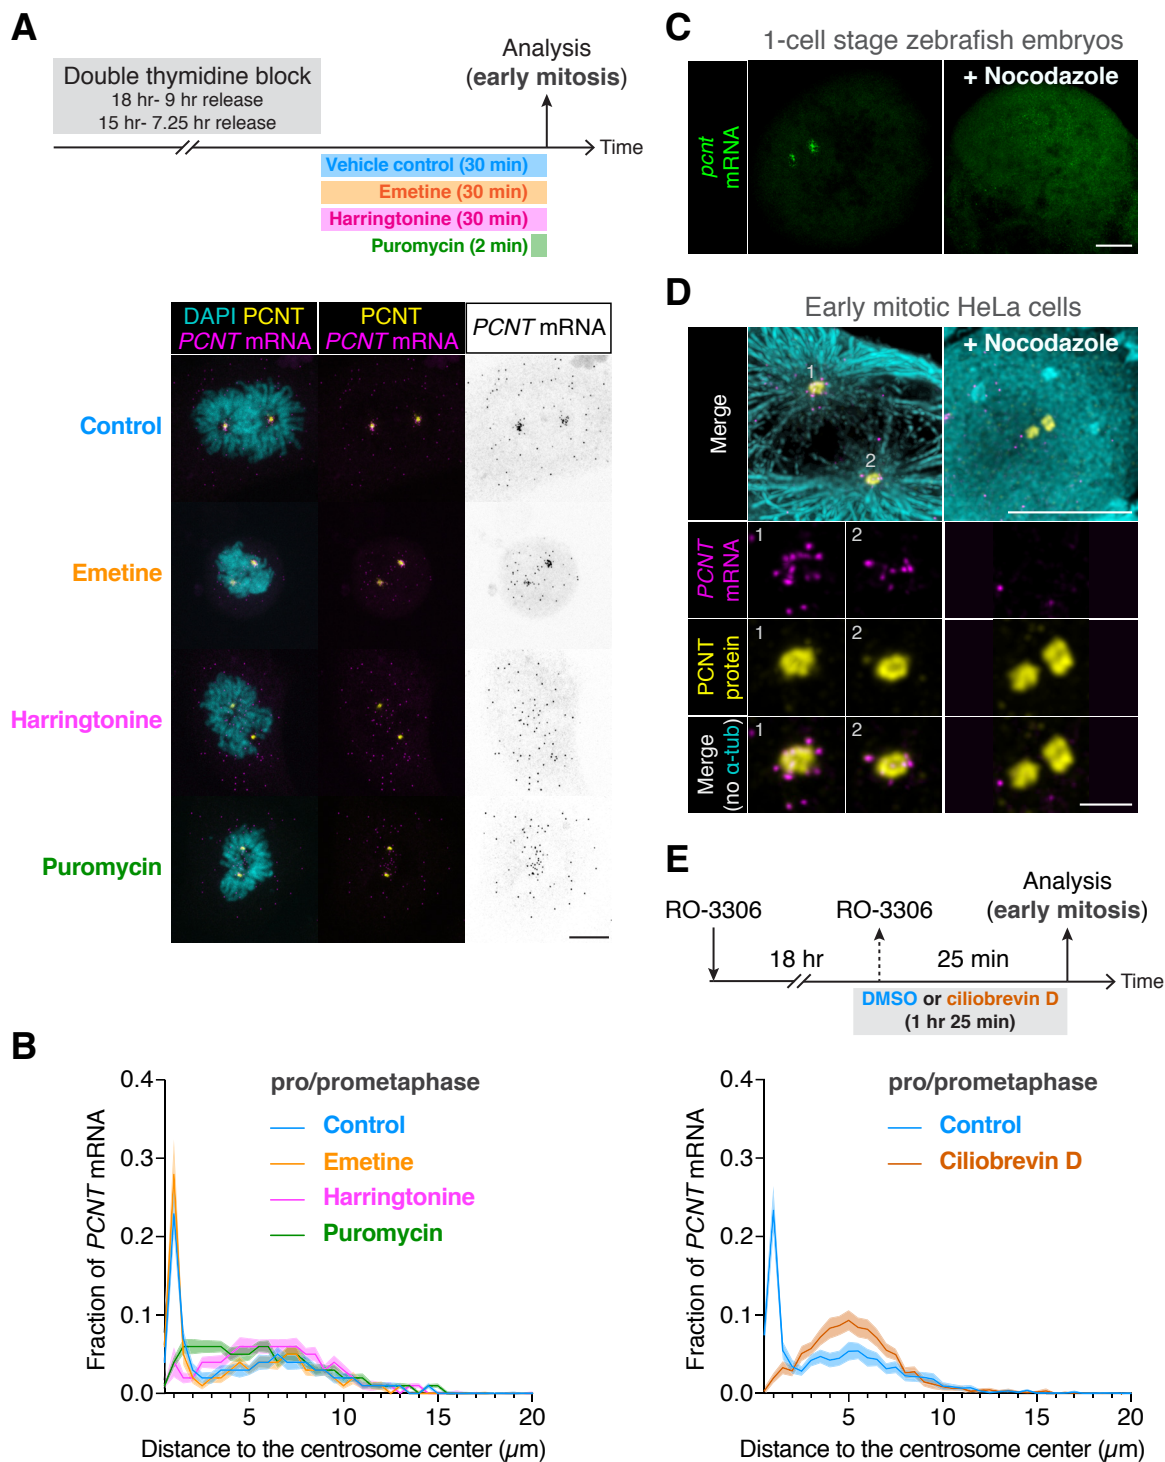

**Figure 4. Centrosomal localization of *pcnt/PCNT* mRNA requires intact polysomes, microtubules, and dynein activity.** (A) HeLa cells were synchronized by a double thymidine block and treated with DMSO vehicle (Control), 208  $\mu\text{M}$  emetine, 3.76  $\mu\text{M}$  harringtonine for 30 minutes, or 300  $\mu\text{M}$  puromycin for 2 minutes before anti-PCNT immunostaining and *PCNT* smFISH. Representative confocal images are shown for each condition. (B) The distribution of *PCNT* mRNA in cells was quantified by measuring the distance between 3D rendered *PCNT* smFISH signals and the center of the nearest centrosome (labeled by anti-PCNT immunostaining). The fractions of mRNA as a function of distance to the nearest centrosome (binned in 0.5  $\mu\text{m}$  intervals) were then plotted as mean (solid lines)  $\pm$  95% CI (shading). Note that *PCNT* mRNA moved away from the centrosome upon the puromycin or harringtonine treatment, but stayed close to the centrosome upon the emetine treatment, similar to the control.  $n=45, 48, 57,$  and  $51$  for control, emetine, puromycin, and harringtonine conditions, respectively, from three independent experiments. (C) Zebrafish embryos were injected with DMSO vehicle or 100  $\mu\text{g/ml}$  nocodazole at the 1-cell stage followed by *pcnt* FISH. (D) HeLa cells were treated with DMSO vehicle or 3  $\mu\text{g/ml}$  nocodazole for 2 hours at 37°C before anti- $\alpha$ -tubulin, anti-PCNT immunostaining, and *PCNT* smFISH. Note that *pcnt/PCNT* mRNA in early embryos (C) and in early mitotic cells (D) was no longer enriched at the centrosome after microtubules were depolymerized. (E) HeLa cells were synchronized by RO-3306 and treated with DMSO vehicle or 50  $\mu\text{M}$  ciliobrevin D for 1 hour 25 minutes before anti-PCNT immunostaining and *PCNT* smFISH. The distribution of *PCNT* mRNA in cells was quantified as in (B).  $n=70$  and  $63$  for control and ciliobrevin D conditions, respectively, from a representative experiment (two technical duplicates per condition). Note that *PCNT* mRNA was no longer enriched at the centrosome upon the ciliobrevin D treatment. Scale bars, 10  $\mu\text{m}$  (A), 100  $\mu\text{m}$  (C), 10  $\mu\text{m}$  (D), and 2  $\mu\text{m}$  (inset in D).

The following figure supplements are available for **Figure 4**:

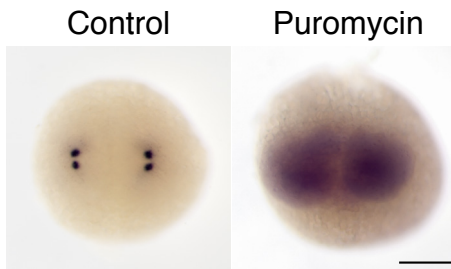

**Figure 4- figure supplement 1. Centrosomal localization of zebrafish *pcnt* mRNA depends on intact polysomes.** RNA *in situ* hybridization showed that *pcnt* transcripts were localized to the centrosomes in the buffer-injected embryo (Control), but were diffused throughout the cell in the embryo injected with ~1 nl of 300  $\mu$ M puromycin at the 1-cell stage (Puromycin). Both embryos shown are at the 2-cell stage. Scale bar: 200  $\mu$ m.

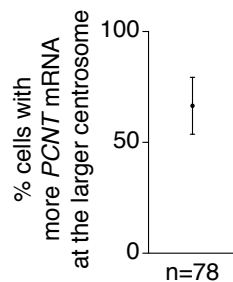

**Figure 4- figure supplement 2. More *PCNT* mRNA was often enriched near the larger centrosome in early mitosis.** In the majority of pro- and prometaphase HeLa cells (~67%), more *PCNT* mRNA was enriched around the larger centrosome. Data are represented as mean  $\pm$  SD, “n” indicates the total number of cells analyzed from four experiments.

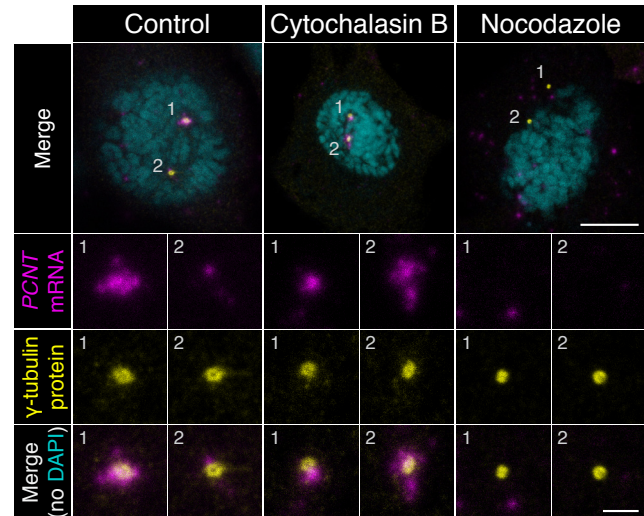

**Figure 4- figure supplement 3. Centrosomal localization of human *PCNT* mRNA during early mitosis is microtubule-dependent.** HeLa cells synchronized at prophase (pro) were treated with 5  $\mu$ g/ml cytochalasin B for 15 minutes or 10  $\mu$ g/ml nocodazole for 30 minutes at 37°C before fluorescent *in situ* hybridization with tyramide signal amplification against *PCNT* mRNA and anti- $\gamma$ -tubulin immunostaining. Note that nocodazole, but not cytochalasin B, disrupted the centrosomal enrichment of *PCNT* mRNA. Scale bars, 10  $\mu$ m and 2  $\mu$ m (inset).

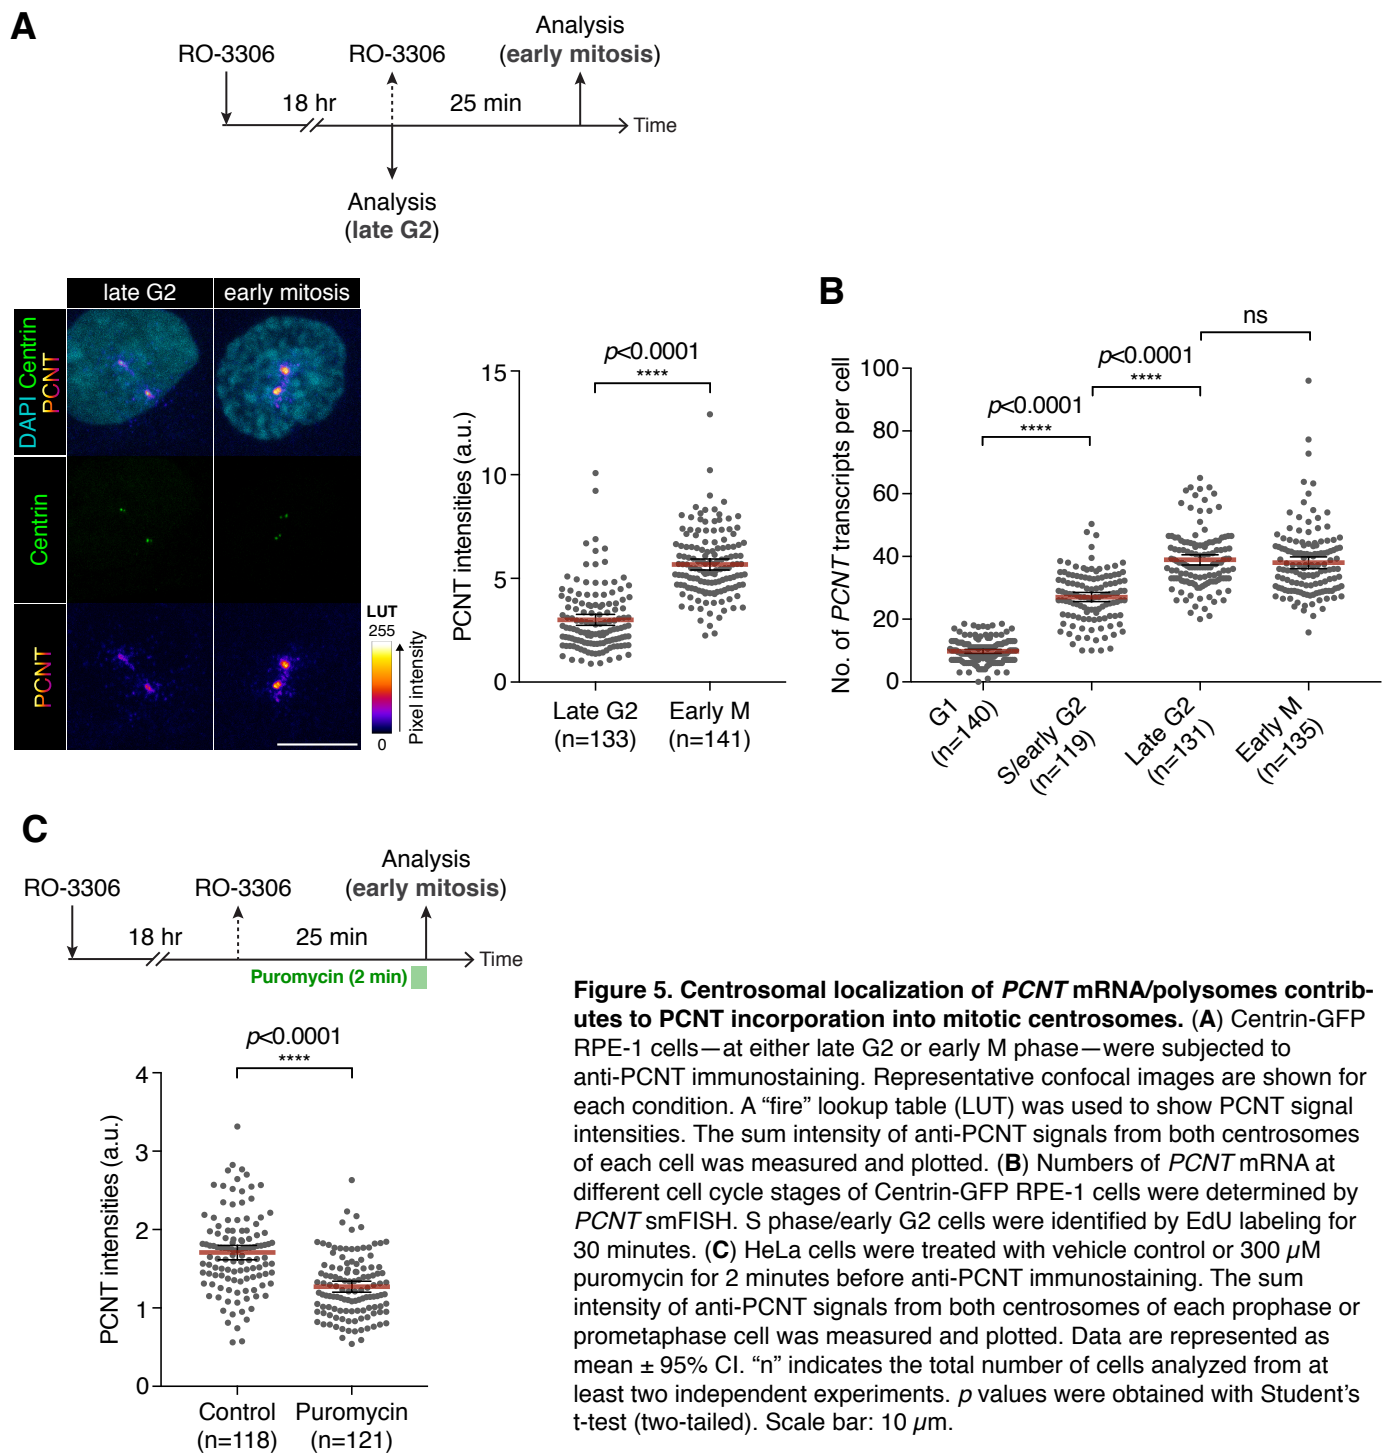

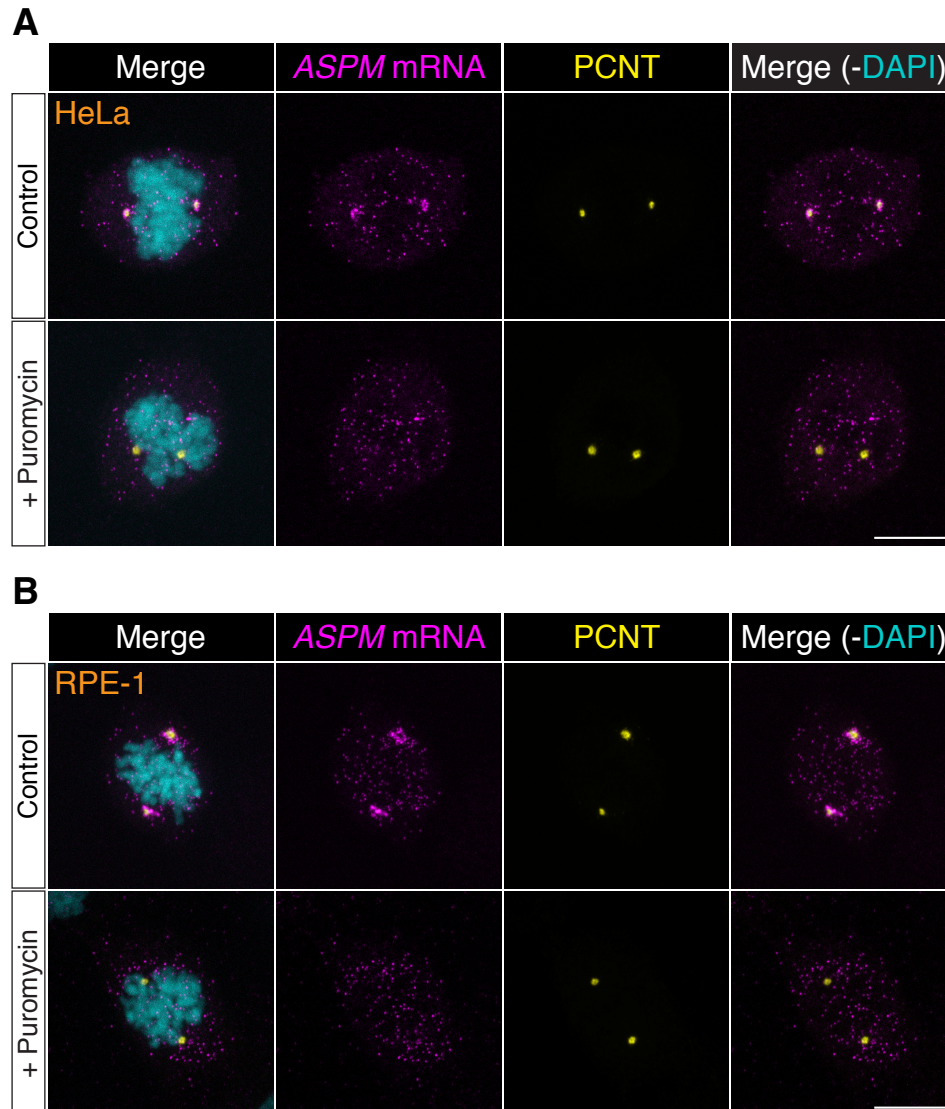

**Figure 6. *ASPM* mRNA is enriched at centrosomes in a translation-dependent manner during mitosis.** Prometaphase HeLa (A) or RPE-1 (B) cells were treated with vehicle (Control) or 300  $\mu$ M puromycin (+ Puromycin) for 2 minutes at 37°C before fixation. The cells were subjected to *ASPM* smFISH and anti-PCNT immunostaining. Note that *ASPM* mRNA was enriched at the centrosomes/spindle poles of the prometaphase cells, but became dispersed throughout the cell upon a short puromycin treatment. Scale bars: 10  $\mu$ m.



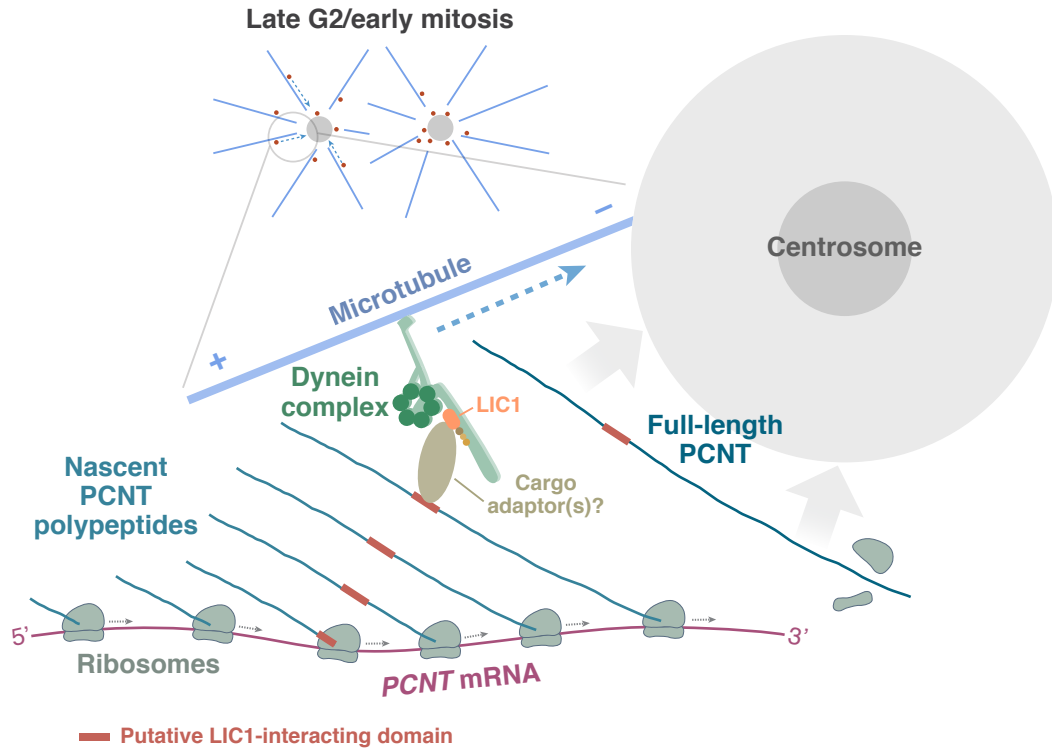

**Figure 7. A model of co-translational targeting of PCNT polysomes to the centrosome during centrosome maturation.** During the late G2/M transition, translation of *PCNT* mRNA is upregulated by an as yet unknown mechanism. The partially translated PCNT nascent polypeptide starts to interact with the dynein motor complex once the dynein light intermediate chain 1 (LIC1)-interacting domain in the N-terminal half of PCNT is synthesized and folded. Subsequently, this nascent polypeptide-dynein interaction allows the entire polysome, which is still actively translating *PCNT* mRNA, to be transported along the microtubule toward the centrosome. This co-translational targeting mechanism may maximize efficiency of PCNT production and delivery to the centrosome, prevent ectopic accumulation of PCNT outside of centrosomes, and/or facilitate integration of PCNT into the expanding PCM during early mitosis.
